1 ***Original research article***

2

3 **Unraveling ChR2-driven stochastic Ca<sup>2+</sup> dynamics in astrocytes – A call for new interventional paradigms**

4 Arash Moshkforoush¶, Lakshmini Balachandar¶, Carolina Moncion¶, Josue Santana, Jorge Riera Diaz\*

5 *Department of Biomedical Engineering, Florida International University*

6 ¶ Equal author contribution

7 \* Corresponding author

8 **Correspondence:**

9 Jorge Riera Diaz  
10 Department of Biomedical Engineering  
11 Florida International University  
12 Engineering Center  
13 10555 West Flagler St, Miami FL 33174  
14 Email: [jrieradi@fiu.edu](mailto:jrieradi@fiu.edu)

15

16

17

18

19

20

21

22

23 **Key words**

24 Astrocyte, optogenetics, channelrhodopsin, stochastic, mathematical model, calcium dynamics

25 **Abstract**

26 Control of astrocytes via modulation of  $\text{Ca}^{2+}$  oscillations using techniques like optogenetics can prove to be crucial  
27 in therapeutic intervention of a variety of neurological disorders. However, a systematic study quantifying the  
28 effect of optogenetic stimulation in astrocytes is yet to be performed. Here, we propose a novel stochastic  
29  $\text{Ca}^{2+}$  dynamics model that incorporates the light sensitive component – channelrhodopsin 2 (ChR2). Utilizing this  
30 model, we studied the effect of various pulsed light stimulation paradigms on astrocytes for select variants of  
31 ChR2 (wild type, ChETA, and ChRET/TC) in both an individual and a network of cells. Our results exhibited a  
32 consistent pattern of  $\text{Ca}^{2+}$  activity among individual cells in response to optogenetic stimulation, i.e., showing  
33 steady state regimes with increased  $\text{Ca}^{2+}$  basal level and  $\text{Ca}^{2+}$  spiking probability. Furthermore, we performed a  
34 global sensitivity analysis to assess the effect of stochasticity and variation of model parameters on astrocytic  
35  $\text{Ca}^{2+}$  dynamics in the presence and absence of light stimulation, respectively. Results indicated that directing  
36 variants towards the first open state of the photo-cycle of ChR2 ( $\phi_1$ ) enhances spiking activity in astrocytes during  
37 optical stimulation. Evaluation of the effect of astrocytic ChR2 expression (heterogeneity) on  $\text{Ca}^{2+}$  signaling  
38 revealed that the optimal stimulation paradigm of a network does not necessarily coincide with that of an  
39 individual cell. Simulation for ChETA-incorporated astrocytes suggest that maximal activity of a single cell  
40 reduced the spiking probability of the network of astrocytes at higher degrees of ChR2 expression efficiency due  
41 to an elevation of basal  $\text{Ca}^{2+}$  beyond physiological levels. Collectively, the framework presented in this study  
42 provides valuable information for the selection of light stimulation paradigms that elicit optimal astrocytic activity  
43 using existing ChR2 constructs, as well as aids in the engineering of future optogenetic constructs.

44

45

## 46 **Author summary**

47 Optogenetics – an avant-garde technique involves targeted delivery of light sensitive ion channels to cells.  
48 Channelrhodopsin 2 (ChR2), an algal derived light sensitive ion channel has extensively been used in  
49 neuroscience to manipulate various cell types in a guided and controlled manner. Despite being predominantly  
50 used in neurons, recent advancements have led to the expansion of the application of optogenetics in non-neuronal  
51 cell types, like astrocytes. These cells play a key role in various aspects of the central nervous system and  
52 alteration of their signaling is associated with various disorders, including epilepsy, stroke and Alzheimer's  
53 disease. Hence, invaluable information for therapeutic intervention can be obtained from using optogenetics to  
54 regulate astrocytic activity in a strategic manner. Here, we propose a novel computational model to assess  
55 astrocytic response to optogenetic stimulation which implicitly accounts for the stochastic character of  $\text{Ca}^{2+}$   
56 signaling in this cell type. We identified light stimulation paradigms suitable for eliciting astrocytic  $\text{Ca}^{2+}$  response  
57 within physiological levels in widely-used ChR2 variants and identified highly sensitive parameters in ChR2  
58 kinetics conducive for higher probability in  $\text{Ca}^{2+}$  spiking. Overall, the results of this model can be used to boost  
59 astrocyte light-induced behavior prediction and the development of improved future optogenetic constructs.

## 60 **Glossary:**

61 ChR - Channelrhodopsin; PM - plasma membrane;  $\text{IP}_3$  - inositol trisphosphate;  $\text{IP}_3\text{R}$  -  $\text{IP}_3$  receptor; CCE -  
62 capacitative calcium entry; CICR - calcium induced calcium release; SOC - store operated calcium channel; ER  
63 - endoplasmic reticulum; ATP- adenosine trisphosphate; SERCA- sarcoplasmic reticulum  $\text{Ca}^{2+}$ -ATPase; PMCA  
64 - plasma membrane  $\text{Ca}^{2+}$  ATPase;  $\text{PLC}\delta$  - phospholipase C delta; SCOs - spontaneous calcium oscillations; LL -  
65 Local linearization; LHS - Latin hypercube sampling; PRCC - partial rank correlation coefficient

## 66 **Introduction**

67 Astrocytes - key players in the brain, are involved in neurovascular coupling [1-3], serve as communication  
68 elements and regulate neuronal activity via gliotransmission [4-6]. They are pivotal in housekeeping roles such  
69 as providing metabolic support to neurons [7, 8], rendering cytoarchitectonic support to the brain environment,

70 and maintaining carbon homeostasis which leads to the regulation of ‘excitatory – inhibitory’ neurotransmitter  
71 balance [9]. Astrocytes are extensively involved in the reduction of toxicity in the neuronal environment through  
72 scavenging reactive oxygen species, thereby minimizing tissue damage [10]. In the case of neurotoxic insults,  
73 they assist microglia in the *de-novo* synthesis of various cytokines and trophic factors resulting in the modulation  
74 of neuroinflammation [11-13]. Dysregulation of astrocytic function results in a multitude of brain disorders  
75 including epilepsy, stroke and Alzheimer’s disease [14-20]. Hence, control of astrocytes is a powerful tool for  
76 intervening and preventing brain dysfunction. Since calcium signaling is one of the major regulatory mechanisms  
77 in astrocytes, its control can serve as a target for therapeutic intervention [21-25].

78 Several research groups have demonstrated the ability to elevating  $Ca^{2+}$  activity in astrocytes via electrical [26-  
79 29], mechanical [30-32] and pharmacological [33, 34] approaches. Upon electrical stimulation, astrocytes exhibit  
80 high frequency oscillations, mainly through L-type  $Ca^{2+}$  channels. However, this methodology lacks cell  
81 specificity due to potential concurrent activation of neurons and suffers low spatial resolution. Additionally, the  
82 feasibility of this method has not yet been tested *in vivo*. Mechanical stimulation, performed to mimic responses  
83 to brain injury and spreading depression [29, 35], lacks clinical feasibility. The use of pharmacological techniques  
84 for targeting these cells in the brain has been limited to basic research due to high invasiveness and low temporal  
85 resolution [36, 37]. Contrarily, optogenetics is an avant-garde minimally invasive approach, which in combination  
86 with advancements in the field of nonlinear optics [38-40], has provided a platform for genetically targeting  
87 specific cell types with high temporal and spatial precision [37, 41-43].

88 In spite of the recent inception of the field of optogenetics, a wide variety of optogenetic tools have been  
89 constructed, among which channelrhodopsin 2 (ChR2) has been one of the most commonly used. There exists an  
90 extensive body of literature on the biophysical characterization of ChR2 variants and their response to various  
91 light stimulation paradigms, predominantly in excitable cells [44-47]. For example, many research groups have  
92 engineered ChR2 variants for enhanced conductance, increasing recovery kinetics and capability of stimulation  
93 at lower light levels in neurons [44, 48]. ChR2 variants have also been modified to form chimeric variants for  
94 regulating responses and facilitating multiwavelength optogenetics in neurons [49]. There have been few studies

95 on optogenetically targeting astrocytes for specific applications [50-54], including their role in memory  
96 enhancement [55] and cortical state switching [56]. However, a holistic approach to quantify the effect of light  
97 stimulation on astrocytes has not yet been formulated, a vital step for strategic manipulation of these cells. In  
98 analyzing this effect, accounting for the stochastic nature of spontaneous calcium oscillations (SCOs) in astrocytes  
99 is imperative. The source of this stochasticity is primarily ascribed to the randomness in fluxes through IP<sub>3</sub>R  
100 clusters and the plasma membrane (PM) [57, 58].

101 This paper seeks to provide a comprehensive platform via mathematical modeling to optimize light stimulation  
102 paradigms for existing optogenetic variants, yielding high astrocytic spiking rates without eliciting non-  
103 physiological behavior, and to aid the development of novel application-based constructs targeting astrocytes. To  
104 this end, we outline a novel stochastic model of astrocyte calcium dynamics with an incorporated optogenetic  
105 component - ChR2. Firstly, we quantify and evaluate the effect of different light stimulation paradigms on the  
106 Ca<sup>2+</sup> dynamics of single cells expressing three existing ChR2 variants i.e. wild type, ChETA, and ChRET/TC.  
107 Secondly, to identify key features necessary for the development of prospective ChR2 constructs, we perform a  
108 global sensitivity analysis of different parameters of the single cell model to Ca<sup>2+</sup> spiking rate and basal levels.  
109 Thirdly, through the incorporation of gap junctions allowing diffusion of IP<sub>3</sub> and Ca<sup>2+</sup>, we analyze the effect of  
110 local light stimulation on the global Ca<sup>2+</sup> response in a network of astrocytes homogeneously expressing ChR2.  
111 Lastly, we investigate the effect of varying degrees of heterogeneity in ChR2 expression on network-wide  
112 astrocytic Ca<sup>2+</sup> spiking rate and basal level upon global light stimulation.

## 113 **Materials and methods:**

### 114 ***The biophysical model:***

115 In this study, we present a novel biophysical model of optogenetically-modified astrocytes. The model is  
116 composed of a combination of the previously published *stochastic astrocyte model* [58, 59] and a *4-state model*  
117 *for ChR2* taken from Stefanescu *et al* [60] and Williams *et al* [61]. The stochastic IP<sub>3</sub>R model is adapted from the

118 Li-Rinzel simplification of the De Young-Keizer model [62-64]. The 4-state ChR2 model assumes the existence  
119 of the channel in two closed states ( $c_1, c_2$ ) and two open states ( $o_1, o_2$ ).

120 **(Insert Fig. 1 around here)**

121 Figure 1 illustrates the schematic of the biophysical model of calcium dynamics of ChR2 expressing astrocytes.  
122 Cationic influx through ChR2 activation is labeled as  $j_{in_{ChR2}}$ . Light stimulation window is modeled as the  
123 commonly used pulse train ( $\theta(t)$ ) given by T (pulse period) and  $\delta$  (pulse width – expressed as percentage of T).  
124  $Ca^{2+}$  in the cytosol activates the  $IP_3$  receptor ( $IP_3R$ ) on the endoplasmic reticulum (ER) membrane, leading to an  
125 efflux of  $Ca^{2+}$  into the cytosol. Cytosolic  $Ca^{2+}$  also binds to  $PLC_\delta$  (on the PM) leading to the production of  $IP_3$  in  
126 the cytosol, which also activates  $IP_3R$  clusters.  $Ca^{2+}$  release from  $IP_3R$  leads to a further increase of  $IP_3R$  activity,  
127 also known as calcium induced calcium release (CICR). Further increase in  $Ca^{2+}$  concentration in the cytosol  
128 inactivates the release from the ER. Release of  $Ca^{2+}$  from the ER leads to capacitative calcium entry (CCE) via  
129 the transmembrane store operated calcium (SOC) channel. Uptake of  $Ca^{2+}$  via sarcoplasmic reticulum  $Ca^{2+}$ -  
130 ATPase (SERCA) pump results in the replenishment of the ER stores from the cytosol. The PM  $Ca^{2+}$  ATPase  
131 (PMCA) pump extrudes  $Ca^{2+}$  from the cytosol to the extracellular (EC) space.

132 Our biophysical model for a single astrocyte is composed of nine state variables, i.e. free cytosolic calcium  
133 concentration –  $[Ca^{2+}]_c$ , inositol triphosphate concentration –  $[IP_3]$ , the fraction of open inactivation  $IP_3R$  gates  
134 –  $h$ , total free  $Ca^{2+}$  concentration –  $c_o$ , fraction of ChR2 in its closed and open states –  $c_1, c_2, o_1, o_2$ , and a variable  
135 capturing temporal kinetics of conformational changes in ChR2 –  $s$ . Additive Weiner processes ( $\sigma$ 's), which  
136 capture the stochasticity in astrocytes and ChR2 dynamics, are added as diffusion terms. A network of  
137 homogeneous/heterogeneous astrocytes was modeled by incorporation of gap junctions,  $J_{gj}$ , between the cells  
138 where the diffusion of  $IP_3$  and  $Ca^{2+}$  were accounted for (network dynamics, Table 1). Quantification of spiking  
139 rate and  $Ca^{2+}$  basal levels were performed pre, during and post stimulus. The equations for astrocyte ' $i$ ' in the  
140 network can be summarized by the following stochastic state-space equation:

$$141 \quad d\mathbf{X}_i = \underbrace{\mathbf{f}(t, \mathbf{X}_i, P)}_{\text{Drift}} dt + \underbrace{\mathbf{g}(P)d\omega}_{\text{Diffusion}} \quad (1)$$

142 where

$$143 \quad \mathbf{X} = \begin{pmatrix} Ca^{2+} \\ IP_3 \\ h \\ C_0 \\ o_1 \\ o_2 \\ c_1 \\ c_2 \\ s \end{pmatrix}; \quad \mathbf{g} = \begin{pmatrix} \sigma_{Ca^{2+}} \\ \sigma_{IP_3} \\ \sigma_h \\ \sigma_{C_0} \\ \sigma_{o_1} \\ \sigma_{o_2} \\ \sigma_{c_1} \\ \sigma_{c_2} \\ \sigma_s \end{pmatrix}; \quad (1.1)$$

144 P denotes the parameters of the model, summarized in Table 1, and components of the  $\mathbf{f}$  vector will be described  
 145 in detail. We have previously estimated the variance of the Weiner processes for  $IP_3$ ,  $Ca_c$ ,  $h$  and  $c_0$ , using the  
 146 local linearization (LL) filter [59, 65] (Weiner processes, Table 1). Potential stochasticity in ChR2 dynamics is  
 147 included in the model using constant Weiner processes and will be explored in later sections.

148 The dynamics of free cytosolic calcium concentration is given by

$$149 \quad d[Ca^{2+}]_{c_i} = (\lambda(v_{Rel} - v_{SERCA}) + \varepsilon(j_{in} + v_{CCE} - v_{out} + j_{in,ChR2}) - J_{gj_{c_{a_i}}})dt + \sigma_{Ca^{2+}}dw_{Ca^{2+}} \quad (2)$$

$$150 \quad J_{gj_{c_{a_i}}} = \sum_k D_{Ca}([Ca]_{c_i} - [Ca]_{c_k}) \quad (2.1)$$

151 Where  $J_{gj_{c_{a_i}}}$  is the gap junctional flux of  $Ca^{2+}$  flowing from astrocyte ‘i’ to its neighboring astrocytes (indicated  
 152 by index k). The efflux of  $Ca^{2+}$  from the ER to the cytosol via the  $IP_3R$  is described by

$$153 \quad v_{Rel} = \alpha_1(v_1 m_{\infty}^3 h_i^3 + v_2)([Ca^{2+}]_{ER} - [Ca^{2+}]_{c_i}) \quad (2.2)$$

154 where calcium in the ER is given by

$$155 \quad [Ca^{2+}]_{ER} = \frac{(c_{o_i} - [Ca^{2+}]_{c_i})}{\alpha_1} \quad (2.3)$$

156 The steady state profile of the open activation  $IP_3R$  gates is

$$157 \quad m_{\infty} = \frac{[IP_3]_i [Ca^{2+}]_{c_i}}{([IP_3]_i + d_1)([Ca^{2+}]_{c_i} + d_5)} \quad (2.4)$$

158 A hill-type kinetic model describing the SERCA pumping is given by

$$159 \quad v_{SERCA} = V_{SERCA} \frac{([Ca^{2+}]_{ci})^2}{([Ca^{2+}]_{ci})^2 + (K_p)^2} \quad (2.5)$$

160 The CCE effect is described as a phenomenological model using the following equation

$$161 \quad v_{CCE} = \frac{x_{CCE}(h_{CCE})^2}{\left(\frac{c_{oi} - [Ca^{2+}]_{ci}}{c_1}\right)^2 + (h_{CCE})^2} \quad (2.6)$$

162  $Ca^{2+}$  extrusion across the PM via PMCA is given by

$$163 \quad v_{out} = k_{out}[Ca^{2+}]_{ci} \quad (2.7)$$

164  $IP_3$  changes in astrocytes mediated by  $PLC_{\delta 1}$  and intercellular diffusion is described as:

$$165 \quad d[IP_3]_i = (X_{IP_3} + PLC_{\delta 1} - K_{IP_3}[IP_3]_i - J_{gj_{IP_3}_i}) dt + \sigma_{IP_3} dw_{IP_3} \quad (3)$$

166 where  $X_{IP_3}$  denotes the basal level of  $IP_3$  production ( $\mu M/s$ ) from fluctuations in the action of receptor-agonists

167 over G-protein-coupled receptors, and  $J_{gj_{IP_3}_i}$  is the gap junctional flux of  $IP_3$  flowing from astrocyte 'i' to its

168 neighboring astrocytes, defined as:

$$169 \quad J_{gj_{IP_3}_i} = \sum_K D_{IP_3} ([IP_3]_i - [IP_3]_k) \quad (3.1)$$

170  $PLC_{\delta 1}$  activity is described as the Hill's kinetic model as

$$171 \quad PLC_{\delta 1} = v_{\delta} \frac{([Ca^{2+}]_{ci})^2}{([Ca^{2+}]_{ci})^2 + (K_{\delta ca})^2} \quad (3.2)$$

172 Dynamics of the fraction of open inactivation  $IP_3R$  inactivation gates is given by

$$173 \quad dh_i = [\alpha_h(1 - h_i) - \beta_h h_i] dt + \sigma_h dw_h \quad (4)$$

174 where the opening ( $\alpha_h$ ) and closing rates ( $\beta_h$ ) rates are

$$175 \quad \alpha_h = \frac{ad_2([IP_3]_i + d_1)}{[IP_3]_i + d_3} \quad (4.1)$$

$$176 \quad \beta_h = a[Ca^{2+}]_{ci} \quad (4.2)$$

177 The total free  $[Ca^{2+}]$  in the cell ( $[Ca^{2+}]_c + [Ca^{2+}]_{ER}$ ) is modeled as



$$178 \quad dc_{0_i} = (\varepsilon(j_{in} + v_{CCE} - v_{out} + j_{in,ChR2}) - J_{Ca_c})dt + \sigma_{Co}dw_{Co} \quad (5)$$

179 The open and closed gating dynamics of ChR2 are given by equations 5-8, as

$$180 \quad do_{1_i} = (p_1 s_i c_{1_i} - (G_{d_1} + e_{12})o_{1_i} + e_{21}o_{2_i})dt + \sigma_{O_1}dw_{O_1} \quad (6)$$

$$181 \quad do_{2_i} = (p_2 s_i c_{2_i} + e_{12}o_{1_i} - (G_{d_2} + e_{21})o_{2_i})dt + \sigma_{O_2}dw_{O_2} \quad (7)$$

$$182 \quad dc_{2_i} = (G_{d_2}O_{2_i} - (P_2 s_i + G_r)c_{2_i})dt + \sigma_{c_2}dw_{c_2} \quad (8)$$

$$183 \quad ds_i = \left( \frac{(S_0(\theta) - s_i)}{\tau_{ChR2}} \right)dt + \sigma_S dw_S \quad (9)$$

184 where  $\theta(t)$  describes the laser stimulus paradigm as a pulse train, and:

$$185 \quad S_0(\theta) = 0.5(1 + \tanh(120(\theta - 0.1))) \quad (9.1)$$

186 The existence of ChR2 in various states should satisfy the following algebraic condition:

$$187 \quad c_1 + c_2 + o_1 + o_2 = 1 \quad (10)$$

188 The current generated by cationic influx through ChR2 is given by

$$189 \quad I_{ChR2} = g_1 A_m G(V_m)(o_{1_i} + \gamma o_{2_i})(V_m - E_{ChR2}) \quad (11)$$

$$190 \quad \text{where } G(V_m) = \frac{\left( 10.6408 - 14.6408 \exp\left(-\frac{V_m}{42.7671}\right) \right)}{V_m} \quad (11.1)$$

191 The resultant flux through ChR2 is

$$192 \quad j_{in,ChR2} = \frac{I_{ChR2}}{Fvol_{cyt} z_{Ca^{2+}}} \quad (11.2)$$

193 The diffusion term in equation 1 implies solving of the state-space system as an integrated model. In a  
 194 deterministic system, due to lack of feedback from  $Ca^{2+}$  dynamics into that of ChR2, the dynamics of ChR2 can  
 195 be solved independently. The model was implemented in MATLAB 2018a (Mathworks Inc.) and was numerically

196 solved using the LL method [59] with an integration step size of  $\Delta t = 0.1$  ms. A listing of all parameters and their  
197 descriptions can be found in Tables 1 and 2.

### 198 ***Light stimulation paradigm***

199 In all simulations performed in this study, laser stimulus was modeled as a square wave pulse train with period  
200  $T$ , pulse width  $\delta$  (expressed as a percentage of  $T$ ), and unit pulse amplitude. This paradigm is employed to evaluate  
201 the effect of light on astrocytic activity, in both individual and a network of gap junction connected astrocytes.

### 202 ***Sensitivity Analysis***

203 A global sensitivity analysis was performed to assess the sensitivity of SCOs to stochastic noise, without light  
204 stimulation. The Latin hypercube sampling (LHS) method with uniform distribution was used to select parameter  
205 sets for testing and solving the system [66, 67]. Variance of each of the Weiner processes was varied between a  
206 lower and an upper bound (state variable variances, Table 3), and the partial rank correlation coefficient (PRCC)  
207 analysis was performed. 95% confidence interval was chosen for statistical significance. A similar global  
208 sensitivity analysis was performed to quantify the sensitivity of the  $\text{Ca}^{2+}$  response to the parameters of ChR2,  
209 during light stimulation. Parameter sets accommodating for ranges across parameters were chosen by the LHS  
210 method with uniform distribution and the PRCCs were computed with respect to the spiking rate and  $\text{Ca}^{2+}$  basal  
211 level in the astrocyte.

## 212 **Results:**

### 213 **Response of ChR2 variants to light stimulation**

214 **(Insert Figure 2 around here)**

215 Figure 2 shows a representative simulation of the response to light stimulation of single astrocytes expressing  
216 four ChR2 variants - wt1, wt2, ChETA, and ChRET/TC (refer to Table 2 for their gating parameters and  
217 conductance). The light stimulation paradigm employed had  $T = 1$  s,  $\delta = 20\%$  with a unit pulse amplitude. Within  
218 the 20-minute window of simulation, the laser stimulus was applied to the astrocyte from 4-12 minutes. Upon

219 light stimulation (panels A-D), the dynamic system shows increases in  $[IP_3]$ ,  $[Ca^{2+}]$  and  $[c_o]$  across ChR2 variants  
220 in the order of  $wt1 < wt2 < ChETA < ChRET/TC$ , while the  $IP_3R$  gating variable ( $h$ ) shows a decrease in the order  
221 of  $wt1 > wt2 > ChETA > ChRET/TC$ . In addition, as compared to the pre and the post light stimulus phases, there is  
222 an increase in basal  $Ca^{2+}$  levels during light stimulation. The ChR2 gating dynamics (panels E-H) indicate that  
223 before light stimulation there is a maximum probability of existence of the channel in the  $c_1$  state. However, upon  
224 stimulation, different ChR2 variants show that the dynamic system proceeds to the other states ( $o_1$ ,  $o_2$  and  $c_2$ ),  
225 with them showing differing gating dynamics.

## 226 **Response of a ChETA-expressing astrocyte to various light stimulation paradigms**

227 **(Insert Figure 3 around here)**

228 Figure 3 shows the effect of stimulation paradigms on the mean spiking rate and the steady state  $Ca^{2+}$  basal level  
229 in astrocytes expressing ChETA (for other ChR2 variants refer to Figures S1-3). Laser parameters (Figure 1) -  $T$   
230 and  $\delta$  were varied between 1-5 seconds and 0-100% of  $T$ , respectively. Figure 3A shows a histogram of all  $Ca^{2+}$   
231 spikes pre and during light stimulation. To exclude minor irrelevant  $Ca^{2+}$  fluctuations, a cutoff prominence  
232 (dashed line – 350 nM) was chosen for spiking rate calculations. The cutoff concentration was chosen based on  
233 the bimodal distribution of the spiking rate histogram, ensuring that only spikes in the larger mode were chosen  
234 and those related to the  $1/f$  noise were excluded from the analysis.

235 For each combination of  $T$  and  $\delta$ , 10 trials were performed for 40 minutes, with the light stimulation starting at  
236 50 seconds until the end of the simulation (indicated by the grey window and the blue bar). Once the  $Ca^{2+}$  baseline  
237 reached a steady profile (indicated by the orange region), the mean spiking rate across trials and mean basal levels  
238 were calculated for each stimulation paradigm. The  $T$ - $\delta$  heat (color) maps, useful to determine optimal  $Ca^{2+}$   
239 signaling behavior in astrocytes exposed to a variety of  $T$  and  $\delta$  combinations, are shown in Figure 3B and C for  
240  $Ca^{2+}$  baseline and  $Ca^{2+}$  spiking, respectively. Results indicate that in the physiologically acceptable ranges chosen  
241 for  $T$  and  $\delta$  ( $Ca^{2+}$  basal levels higher than reported physiological values are separated by the dashed white trace  
242 in panel B), there are regions of increased astrocytic  $Ca^{2+}$  spiking activity (red regions in Figure 3C). Three

243 representative traces from regions with low, intermediate and high astrocytic  $\text{Ca}^{2+}$  spiking activity with  
244 physiological  $\text{Ca}^{2+}$  basal levels are depicted in Figure 3D.

## 245 **Sensitivity of the astrocytic $\text{Ca}^{2+}$ response to system state variables and ChR2 parameters**

246 **(Insert Figure 4 around here)**

247 In Figure 4, a global sensitivity analysis was performed to evaluate the  $\text{Ca}^{2+}$  response of astrocytes (i.e. the spiking  
248 rate and steady basal level) to variations in the stochastic noise variances of the state variables (without light  
249 stimulus) as well as to variations in the parameters of ChR2 (during light stimulation). To generate Figure 4A,  
250 simulations were performed for 10 minutes, for 10 trials without light stimulation. The range of the variances  
251 ( $\sigma$ 's) were chosen between 0 and 0.10 (state variable variances, Table 3). The LHS method with uniform  
252 distribution was used to choose 500 parameter sets for simulations. The PRCC of the variances of the Wiener  
253 processes with respect to the mean  $\text{Ca}^{2+}$  spiking rates, along with the corresponding p-values were computed. As  
254 seen, SCOs are highly sensitive (indicated by \*) to the variances in the order of  $\sigma_{Ca_c} > \sigma_h > \sigma_{IP_3} > \sigma_{C_o} > \sigma_{O_1}$ ;  
255 however, the contributions of  $\sigma_{O_2}$  and  $\sigma_{C_2}$  were not significant.

256 Figure 4B shows the sensitivity of  $\text{Ca}^{2+}$  activity to parameters of ChR2 during light stimulation with the paradigm  
257 shown in Figure 3D, trace 1 ( $T = 4.5\text{s}$  and  $\delta = 30\%$ ). Similar to the analysis in Figure 3A, the cutoff prominence  
258 of the peaks counted was set to 350 nM to exclude 1/f noise related  $\text{Ca}^{2+}$  spikes. The range of each parameter was  
259 chosen such that the four ChR2 variants were encompassed in it (ChR2 parameters, Table 3). 1000 parameter sets  
260 were chosen using the LHS method with uniform distribution. For each parameter set, 10 trial simulations were  
261 performed, each with a duration of 40 minutes, and the respective  $\text{Ca}^{2+}$  spiking rate and steady basal levels were  
262 calculated. Light stimulation was initiated at 50 seconds and continued for the duration of simulation. The PRCCs  
263 were computed and plotted for each of the ChR2 parameters evaluated in this study (Figure 4B). The results  
264 indicate that the parameters  $e_{12}$ ,  $e_{21}$  and  $g_1$  are statistically significant at a 95% confidence interval, for both, the  
265  $\text{Ca}^{2+}$  spiking rate and basal level. While  $e_{12}$ ,  $G_{d1}$  and  $G_{d2}$  are negatively correlated to the  $\text{Ca}^{2+}$  response with respect  
266 to both the spiking rate and basal level,  $e_{21}$ ,  $p_2$  and  $g_1$  are positively correlated. Parameters  $\tau_{ChR2}$  and  $\gamma$  are

267 statistically significant and positively correlated to the  $\text{Ca}^{2+}$  response with respect to the basal level and spiking  
268 rate, respectively.

## 269 **Network-wide response of homogenously ChR2-expressing astrocytes to light stimulation**

### 270 **(Insert Figure 5 around here)**

271 Figure 5 shows the effect of light stimulation on a network of 10x10 astrocytes homogenously expressing the  
272 ChR2 variant - ChETA. Astrocytes are connected to each other in all orientations, i.e., horizontal, vertical and  
273 diagonal directions. Light stimulation was performed with  $T = 2\text{s}$  and  $\delta = 15\%$  and between 12 – 25 minutes  
274 (indicated by the grey shaded region, blue bar). The spiking rate in response to the light stimulation was computed  
275 as a network-wide behavior throughout the total period. Figure 5A shows a histogram of all  $\text{Ca}^{2+}$  spikes, pre and  
276 during light stimulation, revealing also bimodal distributions. Similar to previous simulations, to exclude  
277 irrelevant  $\text{Ca}^{2+}$  fluctuations due to  $1/f$  noise, a cutoff prominence (dashed line – 350 nM) was chosen for spiking  
278 rate calculations. A representative trace of the cytosolic  $\text{Ca}^{2+}$  is shown in Figure 5B, with the properties of the  
279 trace used for quantification, i.e. peak prominence and peaks detected. The grey shaded region represents the time  
280 period during which laser stimulation was performed. Network-wide responses to light stimulation, quantified by  
281 the mean spiking rate for each cell are shown as heat maps, which were calculated for the pre, during and post  
282 light stimulation phases (Figure 5C). The network  $\text{Ca}^{2+}$  baselines at three specific time instances within the pre,  
283 during and post stimulus phases, are shown in Figure 5D (for the full video, refer to supplementary video S1).  
284 The spatial arrangement of astrocytes and the subnetwork of astrocytes being stimulated are shown in Figure 5E.  
285 Astrocytes along the diagonal (red) are labeled 1 through 6. The  $\text{Ca}^{2+}$  activity traces of each cell along the diagonal  
286 are shown in Figure 5F. Results indicate that there are SCOs across the network, prior to light stimulation, while  
287 during stimulation, the astrocytic  $\text{Ca}^{2+}$  spiking rate is maximum in and around the area of light stimulation. Post  
288 light stimulation, the activity is dispersed throughout the network and lasts for long periods of time (Figure 5 B,  
289 C and F). Inspection of  $\text{Ca}^{2+}$  activity traces of various cells across a diagonal with increasing distance from the

290 center of the light stimulation area indicates that there is a decrease in  $\text{Ca}^{2+}$  spiking rate (Figure 5F). This suggests  
291 that there is a propagation of the  $\text{Ca}^{2+}$  spiking probability resulting in a network-wide effect on  $\text{Ca}^{2+}$  dynamics.

292

## 293 **Effect of ChETA-expression heterogeneity on network-wide light stimulation**

294 **(Insert Figure 6 around here)**

295 Figure 6 shows the effect of light stimulation on a network of 5x5 astrocytes with varying degrees of expression  
296 of ChETA. The astrocytes are connected in all directions via gap junctions. For each expression level, five random  
297 distributions of ChR2 expressing astrocytes were generated, and simulations were performed (15 minutes, 5  
298 trials). Light stimulation was performed from 50 seconds until the end of the simulation. Once  $\text{Ca}^{2+}$  baseline  
299 reached a steady profile, the mean and standard deviation of spiking rates and  $\text{Ca}^{2+}$  basal levels were computed.  
300 Figures 6A ( $T = 5\text{s}$ ,  $\delta = 40\%$ ) and 6B ( $T = 2.5\text{s}$ ,  $\delta = 10\%$ ) show an increase in  $\text{Ca}^{2+}$  basal levels and spiking rate  
301 in the network, corresponding to increases in ChR2 expression levels. It is to be noted that in the abovementioned  
302 light stimulation paradigms, the  $\text{Ca}^{2+}$  basal levels are within physiological levels (indicated by dashed line).  
303 Although Figure 6C ( $T = 2\text{s}$ ,  $\delta = 40\%$ ) showed an increase in the  $\text{Ca}^{2+}$  baseline when the ChR2 expression was  
304 increased, there is an overshoot beyond physiological levels at the 80 and 100 % expression levels.  $\text{Ca}^{2+}$  spiking  
305 rate, on the other hand, shows an initial increase until 50% expression level, post which displayed a declining  
306 trend.

## 307 **Discussion**

308 We developed a novel stochastic model to assess the effect of light stimulation on the  $\text{Ca}^{2+}$  dynamics in astrocytes  
309 expressing the widely used opsin - ChR2. We used three ChR2 variants - wild type, ChETA, and ChRET/TC.  
310 The proposed framework can further be adopted for investigating other opsins. Our model accounts for major  
311 intracellular calcium signaling pathways as well as light-activated cationic influx through ChR2. We studied light-  
312 induced  $\text{Ca}^{2+}$  responses in both a single astrocyte and a network of homogeneously/heterogeneously ChR2

313 expressing astrocytes. We identified favorable light stimulation paradigms for the abovementioned ChR2 variants  
314 which result in maximal spiking rates in astrocytic  $\text{Ca}^{2+}$  activity within physiological  $\text{Ca}^{2+}$  basal levels. We also  
315 quantified the sensitivity of the model output to changes in the regulation kinetics and in the conductance of  
316 ChR2. The model presented in this study provides an insight into stimulation paradigms ideal for controlling  
317 astrocytic  $\text{Ca}^{2+}$  activity and offers geneticists an efficient theoretical framework for the design of new variants.

318 Results show that calcium dynamics in astrocytes, as seen in experimental studies [51], can be heavily regulated  
319 by light-induced activation of ChR2 (Figures 2-3 and S1-3). According to our findings, all ChR2 variants studied  
320 in this paper showed similar profiles of activity in response to different laser pulse specifications (Figure 3, S1-  
321 3). The profiles displayed common regions of high spiking rate (point 3, Figure 3C), as well as regions with  
322 intermediate (point 2, Figure 3C) and low activity (point 1, Figure 3C). Also, with the increase in  $\delta$ , there is a  
323 consistent increase in the basal level observed at any given  $T$ . This drastic variability of astrocytic model response  
324 to varying stimulation paradigms emphasizes the importance of choosing ‘ideal’  $T$  and  $\delta$  for desired astrocytic  
325 activity in future studies. A wrong selection of these two parameters could prompt these cells to an unhealthy  
326  $\text{Ca}^{2+}$  signaling regime.

327 Global sensitivity analysis (Figure 4A) indicates that SCOs are significantly dependent on the stochasticity of  $\text{IP}_3$   
328 dynamics, PM fluxes and the  $o_1$  state of ChR2. Similar dependencies to  $\text{IP}_3$  receptor activity and membrane fluxes  
329 have been shown by us [59] and in a recent study by Ding *et al* [57]. Although the source of stochasticity in ChR2  
330 dynamics is yet to be investigated, we hypothesize that potential protein thermal noise and fluctuations in light  
331 intensity due to photon migration dynamics may play a role. Figure 4B indicates that the kinetics of ChR2  
332 significantly affect  $\text{Ca}^{2+}$  spiking rate and basal level. As a general trend, intuitively, directing ChR2 to the open  
333 states ( $o_1$  and  $o_2$ ) from the closed states ( $c_1$  and  $c_2$ ) leads to an increase in astrocytic activity in response to light  
334 stimulation. For instance, decreasing  $G_{d_1}$  and  $G_{d_2}$  facilitates the existence of ChR2 in the open states as they are  
335 negatively correlated to the basal level and spiking rate. Also, increase in  $p_2$  drives the system to the open state.  
336 Similarly, increase in the conductance of ChR2 results in enhanced ionic influx into the cell, thereby elevating

337 both spiking rate and basal levels of calcium. However, less intuitively, increased astrocytic activity occurs when  
338 ChR2 exists in the  $o_1$  state as compared to the  $o_2$  state. This can be observed, as an increase in  $e_{21}$  and decrease in  
339  $e_{12}$  led to the existence of ChR2 in  $o_1$  state (see Figure 1 inset). Collectively, our results suggest that for the light  
340 stimulation paradigm used in our global sensitivity analysis, maximal astrocytic activity can be achieved when  
341 ChR2 is directed towards the  $o_1$  state, which can be used for future development of ChR2 variants.

342 An important aspect in experimental optogenetics is ChR2 expression levels (e.g., transduction efficiency). While  
343 incorporating genetic material into the cell, heterogeneity in the degree of expression might occur [68, 69]. Model  
344 results suggest that network-wide  $Ca^{2+}$  response in astrocytes to light stimulation depends heavily not only on the  
345 expanse of stimulation and specification of the paradigm, but also on the degree of heterogeneity (Figures 5, 6,  
346 S1-3). We observed the propagation of the probability of  $Ca^{2+}$  spiking in response to local light stimulus in a  
347 network of homogeneously ChR2 - expressing astrocytes (efficiency of 100%, Figure 5). In heterogeneously  
348 ChR2 - expressing astrocytes subjected to a given network-wide stimulus paradigm, differing degrees of  
349 heterogeneity resulted in varying degrees of  $Ca^{2+}$  spiking and basal levels (Figure 6). The expected increase in  
350 the  $Ca^{2+}$  spiking rate with the increase in the fraction of ChR2 expression was observed in stimulation paradigms  
351 corresponding to points 1 and 2 in Figure 3 (Figure 6A and B). However, notably, due to saturation of astrocytic  
352  $Ca^{2+}$  signaling, i.e., elevation of the  $Ca^{2+}$  baseline beyond physiological levels, there is a counteracting effect on  
353  $Ca^{2+}$  spiking rate when expression is increased (Figure 6C at 80 and 100%). This indicates that design of  
354 experiments for stimulation of a network of genetically altered astrocytes cannot be solely based upon  
355 observations from single cells, as other factors like ChR2 expression levels and the specific stimulation design  
356 ( $T$ ,  $\delta$ ) play a significant role.

357 The model presented in this paper aimed at studying the effect of light stimulation on  $Ca^{2+}$  dynamics in  
358 optogenetically-enabled astrocytes. The model does not include the dynamics of other major ionic species crucial  
359 in the function of these cells. Furthermore, membrane electric potential dynamics are not included in the current  
360 model, and hence voltage gated calcium channels have not been incorporated. This modeling approach can be  
361 applied to other ChR2 variants upon availability of quantified parameters. We sought to provide a minimalistic  
16



362 theoretical framework which can readily be employed by researchers for the investigation of light induced  $\text{Ca}^{2+}$   
 363 responses in astrocytes. Combination of the presented model with more detailed models as in Savtchenko *et al*  
 364 [70] and Lallouette *et al* [71] where exhaustive geometry and dynamics of various ionic species important for  
 365 astrocytic  $\text{Ca}^{2+}$  signaling are accounted for, can enhance our understanding of the intricacies of the behavior of  
 366 these cells and their response to light.

### 367 Acknowledgments

368 This study was supported by the National Institutes of Health (1R56NS094784-01A), Wallace Coulter Foundation  
 369 – BME SEED grant – Florida International University (FIU), and Dissertation Year Fellowship (DYF) from the  
 370 University Graduate School at FIU (Arash Moshkforoush). The authors would like to sincerely thank Dr. James  
 371 Schummers, Dr. Nikolaos Tsoukias, Dr. Rita Alevriadou, Mr. Ramkrishnan Krishnan, and Mr. Ricardo Siu for  
 372 insightful discussions.

### 373 Author contributions

374 Model development: AM LB CM JS JR. Analysis/discussion of results: CM AM LB JR. Literature review: LB  
 375 AM CM. Manuscript writing: LB AM CM JR.

376 **Table 1. Astrocyte Model Parameters**

|                                 | <i>Parameter</i>      | <i>Value</i> | <i>Unit</i>                             | <i>Description</i>                                                                                                          | <i>Source</i>    |
|---------------------------------|-----------------------|--------------|-----------------------------------------|-----------------------------------------------------------------------------------------------------------------------------|------------------|
| <b>IP<sub>3</sub> Dynamics</b>  | $v_{\delta}$          | 0.15         | $\mu\text{M/s}$                         | Maximum rate of IP <sub>3</sub> production (PLC <sub><math>\delta</math></sub> )                                            | [58, 59]         |
|                                 | $K_{\delta}\text{Ca}$ | 0.56         | $\mu\text{M}$                           | Half saturation constant of $\text{Ca}^{2+}$ resulting from IP <sub>3</sub> synthesis (PLC <sub><math>\delta</math></sub> ) | [58, 59]         |
|                                 | $K_{IP_3}$            | 1.25         | $\text{s}^{-1}$                         | IP <sub>3</sub> degradation rate                                                                                            | [58, 59, 72]     |
|                                 | $X_{IP_3}$            | 0.14         | $\mu\text{M/s}$                         | Basal level of cytosolic IP <sub>3</sub> production                                                                         | [58, 59]         |
| <b>Ca<sup>2+</sup> Dynamics</b> | $x_{\text{CCE}}$      | 0.01         | $\mu\text{M/s}$                         | Maximum rate of activation dependent on $\text{Ca}^{2+}$ (CCE) influx (phenomenological value)                              | [58, 59, 73]     |
|                                 | $h_{\text{CCE}}$      | 10           | $\mu\text{M}$                           | Half-inactivation constant for CCE influx                                                                                   | [58, 59, 73]     |
|                                 | $\alpha_1$            | 0.19         | $\sim$                                  | Volume ratio between ER and cytosol                                                                                         | [58, 59]         |
|                                 | $v_{\text{SERCA}}$    | 0.90         | $\mu\text{M/s}$                         | Maximum rate constant of SERCA pump                                                                                         | [58, 59, 74]     |
|                                 | $K_p$                 | 0.10         | $\mu\text{M}$                           | $\text{Ca}^{2+}$ sensitivity of the SERCA pump                                                                              | [58, 59, 75-77]  |
|                                 | $d_1$                 | 0.13         | $\mu\text{M}$                           | Dissociation constant for IP <sub>3</sub> (IP <sub>3</sub> R)                                                               | [58, 59, 63]     |
|                                 | $d_5$                 | 0.08         | $\mu\text{M}$                           | $\text{Ca}^{2+}$ activation constant (IP <sub>3</sub> R)                                                                    | [58, 59, 63]     |
|                                 | $v_1$                 | 6            | $\text{s}^{-1}$                         | Ligand-operated IP <sub>3</sub> R channel flux constant                                                                     | [58, 59, 74, 77] |
|                                 | $v_2$                 | 0.11         | $\text{s}^{-1}$                         | $\text{Ca}^{2+}$ passive leakage flux constant                                                                              | [58, 59, 74, 77] |
|                                 | $k_{\text{out}}$      | 0.50         | $\text{s}^{-1}$                         | Rate constant of $\text{Ca}^{2+}$ extrusion                                                                                 | [58, 59]         |
|                                 | $\lambda$             | 1            | $\sim$                                  | Time scaling factor                                                                                                         | [58, 59]         |
| $\varepsilon$                   | 0.01                  | $\sim$       | Ratio of PM to ER membrane surface area | [58, 59, 63]                                                                                                                |                  |

|                          |                    |                       |                       |                                                                                                         |              |
|--------------------------|--------------------|-----------------------|-----------------------|---------------------------------------------------------------------------------------------------------|--------------|
|                          | $j_{in}$           | 0.04                  | $\mu\text{M/s}$       | Passive leakage                                                                                         | [58, 59]     |
|                          | $v_m$              | -70                   | mV                    | Membrane voltage                                                                                        |              |
|                          | $vol_{cyt}$        | $10^{-12}$            | L                     | Volume of the cytosol, assuming spherical cell                                                          | [78]         |
|                          | $A_m$              | $4.83 \times 10^{-6}$ | $\text{cm}^2$         | Surface area of the astrocyte membrane (calculated using $vol_{cyt}$ and assuming spherical cell shape) | ~            |
|                          | $F$                | $9.65 \times 10^4$    | C/mol                 | Faraday's constant                                                                                      | ~            |
|                          | $z_{Ca}$           | 2                     | ~                     | Valence of $\text{Ca}^{2+}$                                                                             | ~            |
| <b>Gating Parameters</b> | $a$                | 0.20                  | $(\mu\text{Ms})^{-1}$ | Rate constant for $\text{Ca}^{2+}$ binding in $\text{IP}_3$ inhibitory site                             | [58, 59, 63] |
|                          | $d_2$              | 1.05                  | $\mu\text{M}$         | Dissociation constant for $\text{Ca}^{2+}$ inhibition ( $\text{IP}_3\text{R}$ )                         | [58, 59, 63] |
|                          | $d_3$              | 0.94                  | $\mu\text{M}$         | Dissociation constant for $\text{IP}_3$ ( $\text{IP}_3\text{R}$ )                                       | [58, 59, 63] |
| <b>Network Dynamics</b>  | $D_{IP_3}$         | 1                     | $\text{s}^{-1}$       | Rate of $\text{IP}_3$ diffusion                                                                         | [77]         |
|                          | $D_{Ca^{2+}}$      | 0.01                  | $\text{s}^{-1}$       | Rate of $\text{Ca}^{2+}$ diffusion                                                                      | [77]         |
| <b>Weiner Processes</b>  | $\sigma_{IP_3}$    | 0.02                  | $\text{s}^{-1/2}$     | Variance of Wiener process of $\text{IP}_3$                                                             | [58, 59]     |
|                          | $\sigma_{Ca^{2+}}$ | 0.01                  | $\text{s}^{-1/2}$     | Variance of Wiener process of $\text{Ca}_e$                                                             | [58, 59]     |
|                          | $\sigma_h$         | 0.07                  | $\text{s}^{-1/2}$     | Variance of Wiener process of h                                                                         | [58, 59]     |
|                          | $\sigma_{c_0}$     | 0.01                  | $\text{s}^{-1/2}$     | Variance of Wiener process of $c_0$                                                                     | [58, 59]     |
|                          | $\sigma_{o_1}$     | 0.02                  | $\text{s}^{-1/2}$     | Variance of Wiener process of $o_1$                                                                     | Model est.   |
|                          | $\sigma_{o_2}$     | 0.02                  | $\text{s}^{-1/2}$     | Variance of Wiener process of $o_2$                                                                     | Model est.   |
|                          | $\sigma_{c_2}$     | 0.02                  | $\text{s}^{-1/2}$     | Variance of Wiener process of $c_2$                                                                     | Model est.   |
|                          | $\sigma_s$         | 0                     | $\text{s}^{-1/2}$     | Variance of Wiener process of s                                                                         | Model est.   |

377

378

379

**Table 2. ChR2 4-State Model Parameters**

| <i>Parameter</i> | <i>ChR2 Variant</i> | <i>Value</i> | <i>Unit</i>      | <i>Description</i>                              | <i>Source</i> |
|------------------|---------------------|--------------|------------------|-------------------------------------------------|---------------|
| $p_1$            | ChRwt               | 0.06         | $\text{ms}^{-1}$ | Maximum excitation rate of $c_1$                | [44, 48, 60]  |
|                  | ChRwt2              | 0.12         |                  |                                                 |               |
|                  | ChETA               | 0.07         |                  |                                                 |               |
|                  | ChRET/TC            | 0.13         |                  |                                                 |               |
| $G_{d_1}$        | ChRwt               | 0.46         | $\text{ms}^{-1}$ | Rate constant for the $o_1$ to $c_1$ transition | [44, 48, 60]  |
|                  | ChRwt2              | 0.01         |                  |                                                 |               |
|                  | ChETA               | 0.01         |                  |                                                 |               |
|                  | ChRET/TC            | 0.01         |                  |                                                 |               |
| $e_{12}$         | ChRwt               | 0.20         | $\text{ms}^{-1}$ | Rate constant for the $o_1$ to $o_2$ transition | [44, 48, 60]  |
|                  | ChRwt2              | 4.38         |                  |                                                 |               |
|                  | ChETA               | 10.51        |                  |                                                 |               |
|                  | ChRET/TC            | 16.11        |                  |                                                 |               |
| $e_{21}$         | ChRwt               | 0.01         | $\text{ms}^{-1}$ | Rate constant for the $o_2$ to $o_1$ transition | [44, 48, 60]  |
|                  | ChRwt2              | 1.60         |                  |                                                 |               |
|                  | ChETA               | 0.01         |                  |                                                 |               |
|                  | ChRET/TC            | 1.09         |                  |                                                 |               |
| $p_2$            | ChRwt               | 0.06         | $\text{ms}^{-1}$ | Maximum excitation rate of $c_2$                | [44, 48, 60]  |
|                  | ChRwt2              | 0.01         |                  |                                                 |               |
|                  | ChETA               | 0.06         |                  |                                                 |               |
|                  | ChRET/TC            | 0.02         |                  |                                                 |               |
| $G_{d_2}$        | ChRwt               | 0.07         | $\text{ms}^{-1}$ | Rate constant for the $o_2$ to $c_2$ transition | [44, 48, 60]  |
|                  | ChRwt2              | 0.12         |                  |                                                 |               |

|               |                     |                       |                  |                                                                                                                     |              |
|---------------|---------------------|-----------------------|------------------|---------------------------------------------------------------------------------------------------------------------|--------------|
|               | <b>ChETA</b>        | 0.15                  |                  |                                                                                                                     |              |
|               | <b>ChRET/TC</b>     | 0.13                  |                  |                                                                                                                     |              |
| $G_r$         | <b>ChRwt</b>        | $9.35 \times 10^{-5}$ | $\text{ms}^{-1}$ | Recovery rate of the $c_1$ state after light pulse is turned off                                                    | [44, 48, 60] |
|               | <b>ChRwt2</b>       | $9.35 \times 10^{-5}$ |                  |                                                                                                                     |              |
|               | <b>ChETA</b>        | $1 \times 10^{-3}$    |                  |                                                                                                                     |              |
|               | <b>ChRET/TC</b>     | $3.85 \times 10^{-4}$ |                  |                                                                                                                     |              |
| $\tau_{ChR2}$ | <b>ChRwt</b>        | 6.32                  | $\text{ms}^{-1}$ | Activation time of the ChR2 ion channel                                                                             | [44, 48, 60] |
|               | <b>ChRwt2</b>       | 0.51                  |                  |                                                                                                                     |              |
|               | <b>ChETA</b>        | 1.59                  |                  |                                                                                                                     |              |
|               | <b>ChRET/TC</b>     | 0.36                  |                  |                                                                                                                     |              |
| $g_1$         | <b>ChRwt</b>        | 0.03                  | $\text{mS/cm}^2$ | Maximum conductance of the ChR2 ion channel in the $o_1$ state                                                      | [44, 48, 60] |
|               | <b>ChRwt2</b>       | 0.02                  |                  |                                                                                                                     |              |
|               | <b>ChETA</b>        | 0.01                  |                  |                                                                                                                     |              |
|               | <b>ChRET/TC</b>     | 0.02                  |                  |                                                                                                                     |              |
| $\gamma$      | <b>ChRwt</b>        | 0.11                  | ~                | Ratio of maximum conductance of the ChR2 ion channel in the $o_2$ and $o_1$ state<br>$\left(\frac{g_2}{g_1}\right)$ | [44, 48, 60] |
|               | <b>ChRwt2</b>       | 0.10                  |                  |                                                                                                                     |              |
|               | <b>ChETA</b>        | 0.88                  |                  |                                                                                                                     |              |
|               | <b>ChRET/TC</b>     | 0.56                  |                  |                                                                                                                     |              |
| $E_{ChR2}$    | <b>All variants</b> | 0                     | mV               | Reversal potential of ChR2                                                                                          | [61]         |

380

381

382

383

**Table 3. Global Sensitivity Analysis Ranges for each State Variable Variance and ChR2 Parameter**

|                                 | <b>Parameter</b>   | <b>Range</b>                | <b>Unit</b>       |
|---------------------------------|--------------------|-----------------------------|-------------------|
| <b>State Variable Variances</b> | $\sigma_{IP_3}$    | 0 – 0.10                    | $\text{s}^{-1/2}$ |
|                                 | $\sigma_{Ca^{2+}}$ | 0 – 0.10                    | $\text{s}^{-1/2}$ |
|                                 | $\sigma_h$         | 0 – 0.10                    | $\text{s}^{-1/2}$ |
|                                 | $\sigma_{c_0}$     | 0 – 0.10                    | $\text{s}^{-1/2}$ |
|                                 | $\sigma_{o_1}$     | 0 – 0.10                    | $\text{s}^{-1/2}$ |
|                                 | $\sigma_{o_2}$     | 0 – 0.10                    | $\text{s}^{-1/2}$ |
|                                 | $\sigma_{c_2}$     | 0 – 0.10                    | $\text{s}^{-1/2}$ |
| <b>ChR2 Parameters</b>          | $p_1$              | $51.28 - 1.50 \times 10^2$  | $\text{ms}^{-1}$  |
|                                 | $G_{d_1}$          | $8.16 - 5.47 \times 10^2$   | $\text{ms}^{-1}$  |
|                                 | $e_{12}$           | $163.52 - 1.93 \times 10^4$ | $\text{ms}^{-1}$  |
|                                 | $e_{21}$           | $4.00 - 1.31 \times 10^3$   | $\text{ms}^{-1}$  |
|                                 | $p_2$              | $14.08 - 7.70 \times 10^1$  | $\text{ms}^{-1}$  |
|                                 | $G_{d_2}$          | $56.32 - 1.81 \times 10^2$  | $\text{ms}^{-1}$  |
|                                 | $G_r$              | 0.075 – 1.00                | $\text{ms}^{-1}$  |
|                                 | $\tau_{ChR2}$      | 0.000 – 0.0003              | $\text{ms}^{-1}$  |
|                                 | $\gamma$           | 0.000 – 0.011               | ~                 |
|                                 | $g_1$              | 0.0001 – 0.091              | $\text{mS/cm}^2$  |

384

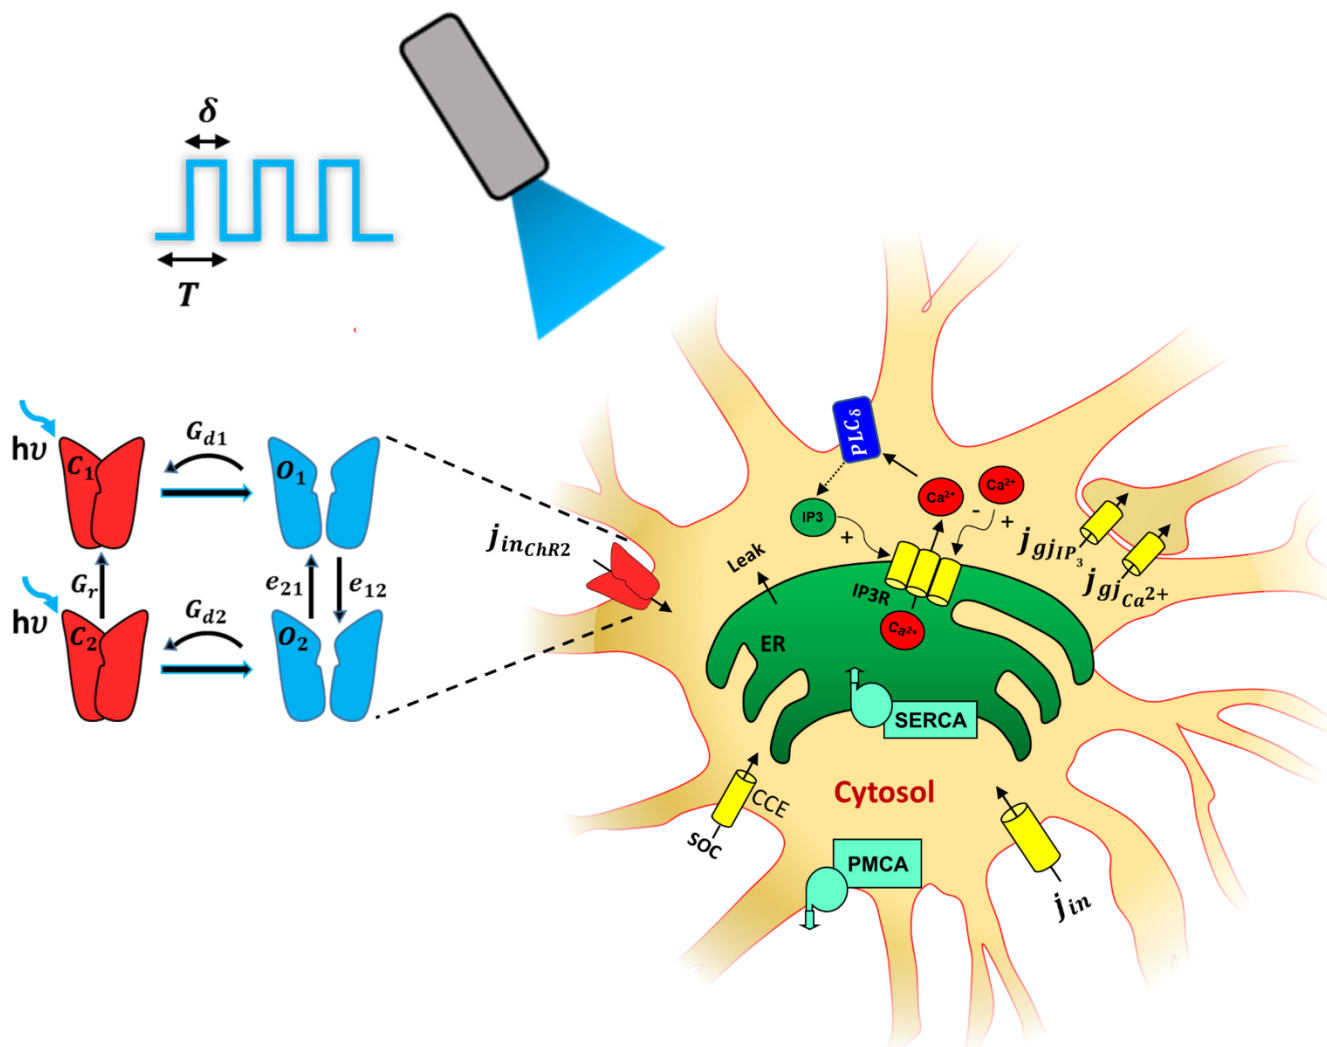

385  
386

**Figure 1. Schematic of the biophysical model of a ChR2 - expressing astrocyte.** Inset: The 4-state model of

387 Channelrhodopsin 2 (ChR2) – closed states ( $c_1$  and  $c_2$ ) in red, open states ( $o_1$  and  $o_2$ ) in blue. The rate constants  
388 of transitions between states are depicted in the figure. Blue light ( $h\nu$ : 473nm) opens ChR2, facilitating cationic  
389 influx  $j_{inChR2}$ , including  $Ca^{2+}$ , initiating a cascade of  $Ca^{2+}$  responses. The light stimulation window is illustrated as  
390 a pulse train given by  $T$  (pulse period) and  $\delta$  (pulse width). The model accounts for: 1)  $Ca^{2+}$  release from the  
391 endoplasmic reticulum (ER) into the cytosol via the  $IP_3R$  clusters, 2)  $PLC\delta$  mediated production of  $IP_3$ , 3)  
392 capacitative calcium entry phenomenon (CCE) via the store operated calcium channel (SOC), 4) passive leak  
393 from the ER to the cytosol, 5) replenishment of ER stores via the SERCA pump, 6) extrusion of  $Ca^{2+}$  by PMCA  
394 pump (plasma membrane  $Ca^{2+}$  ATPase) into the extracellular (EC) space, and 7) passive leak ( $j_{in}$ ) into the cytosol

395 from the EC. In a network of astrocytes, each cell is connected to its neighboring cells through  $\text{Ca}^{2+}$  and  $\text{IP}_3$   
396 permeable gap junctions, indicated as  $j_{gj_{\text{Ca}^{2+}}}$  and  $j_{gj_{\text{IP}_3}}$ , respectively.

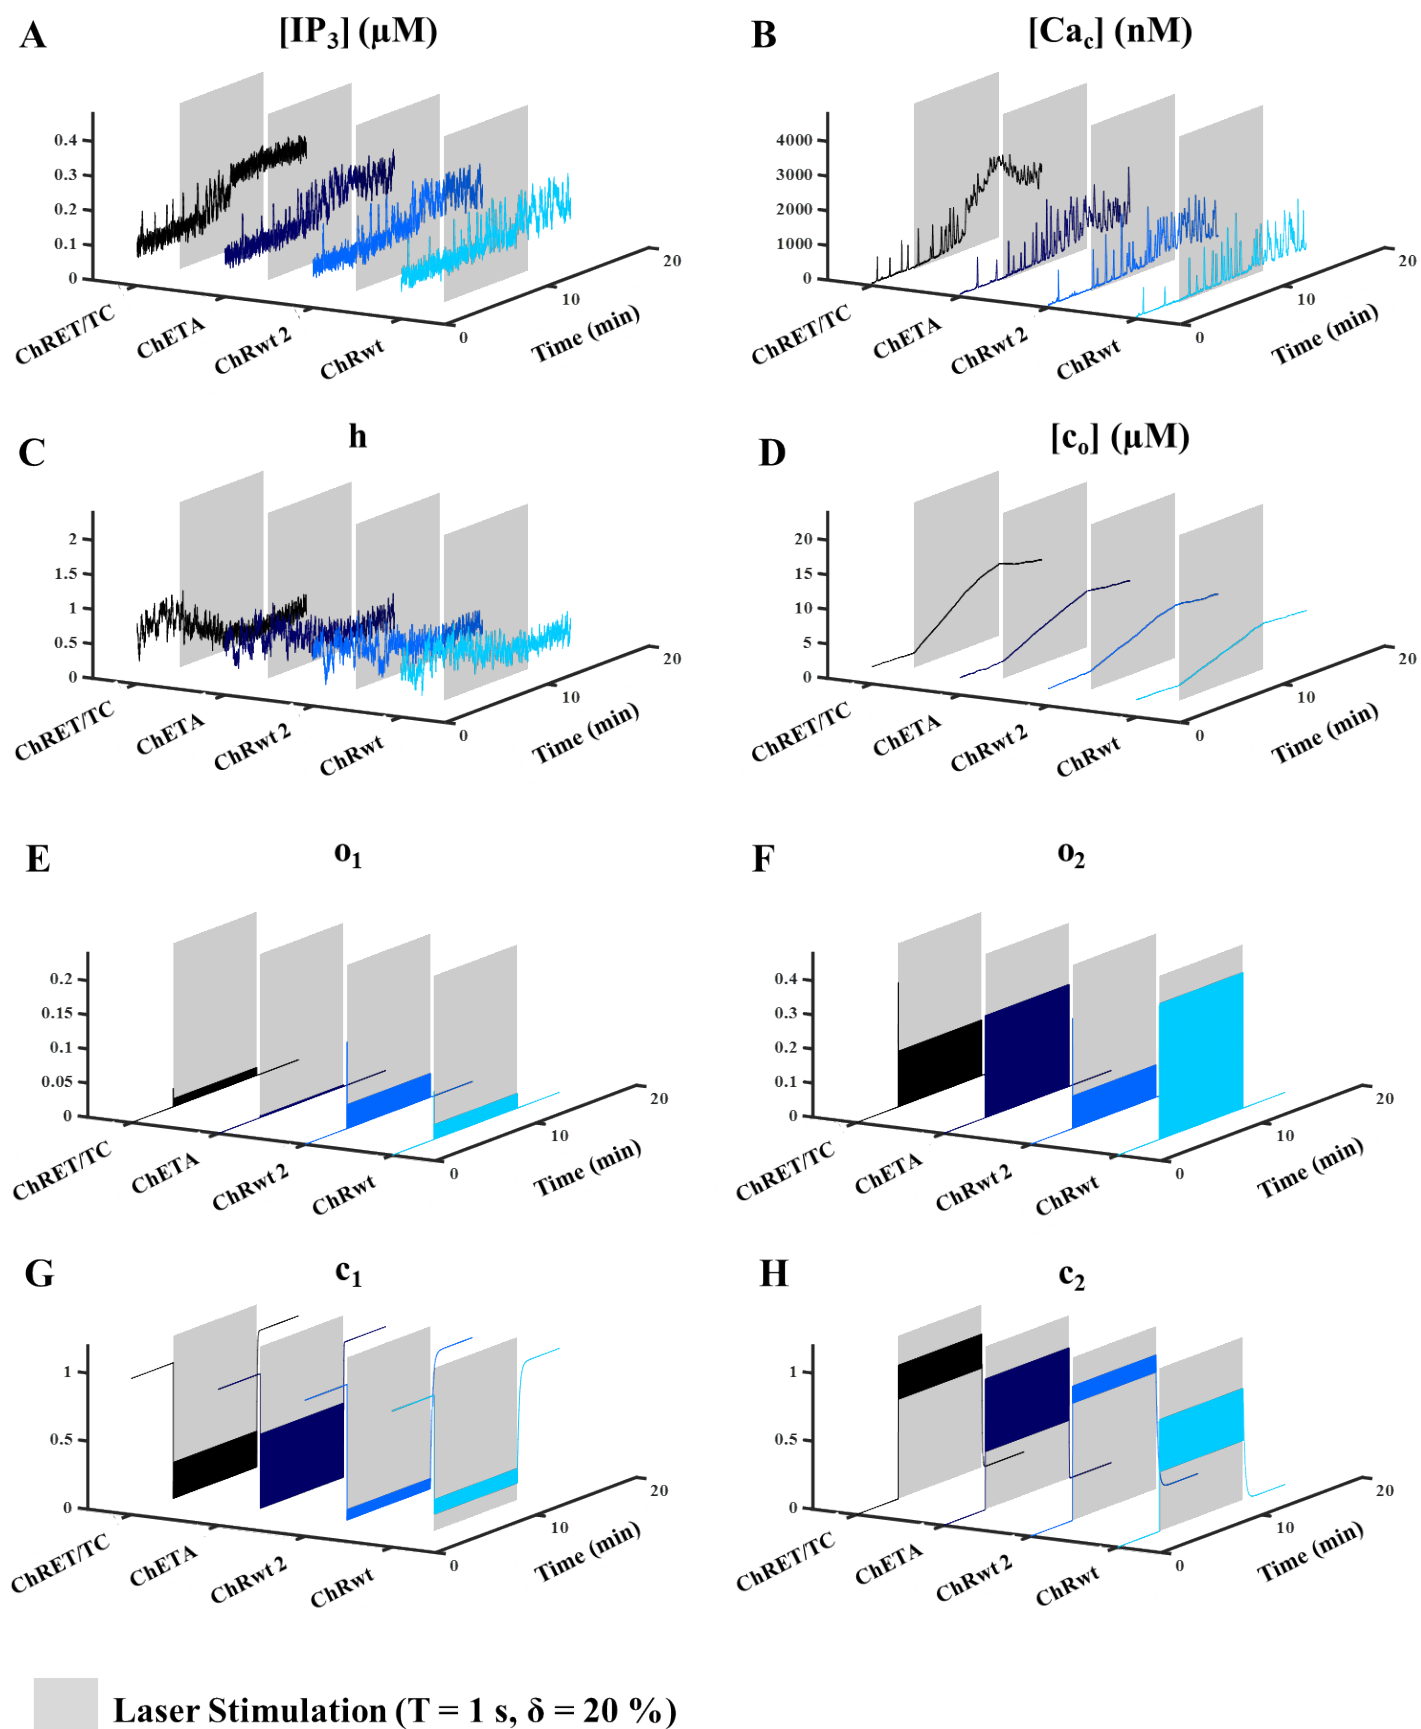

397  
398

**Figure 2.** Response of ChR2 variants (wild type 1 (wt1), wild type 2 (wt2), ChETA and ChRET/TC) to light

399 **stimulation.** The stimulation paradigm (from 4 to 12 minutes, gray shaded region) is a pulse train with the  
400 duration ( $T$ ) = 1 s, pulse width ( $\delta$ ) = 20% (0.2 s), and a unit pulse amplitude. **(A-D)** Representative traces of  $IP_3$   
401 level ( $[IP_3]$ ), cytosolic calcium ( $[Ca_c]$ ), inactivation  $IP_3R$  gating variable ( $h$ ), and total calcium concentration ( $[c_o]$ )  
402 for an astrocyte expressing various ChR2 variants upon laser light stimulation are illustrated. Results show high  
403 sensitivity of all variables to light stimulation. In particular, increase in  $[IP_3]$ ,  $[Ca_c]$ , and  $[c_o]$ , and a decrease in  $h$   
404 for all variants during light stimulation is observed.  $[Ca_c]$  traces for the ChRET/TC variant during stimulation  
405 shows an elevation of calcium beyond physiological levels, and an apparent reduction in the calcium spiking  
406 activity compared to other variants shown in panel B. **(E-H)** Representative traces of the open ( $o_1, o_2$ ) and closed  
407 states of ChR2 ( $c_1, c_2$ ) are plotted with respect to time (min), for an astrocyte expressing different variants of  
408 ChR2. During pre and post light stimulation phases, all variants have the tendency to stay in the  $c_1$  state. During  
409 the period of stimulus, however, variants show varying degrees of existence in all open and closed states of ChR2.

410

411

412

413

414

415

416

417

418

419

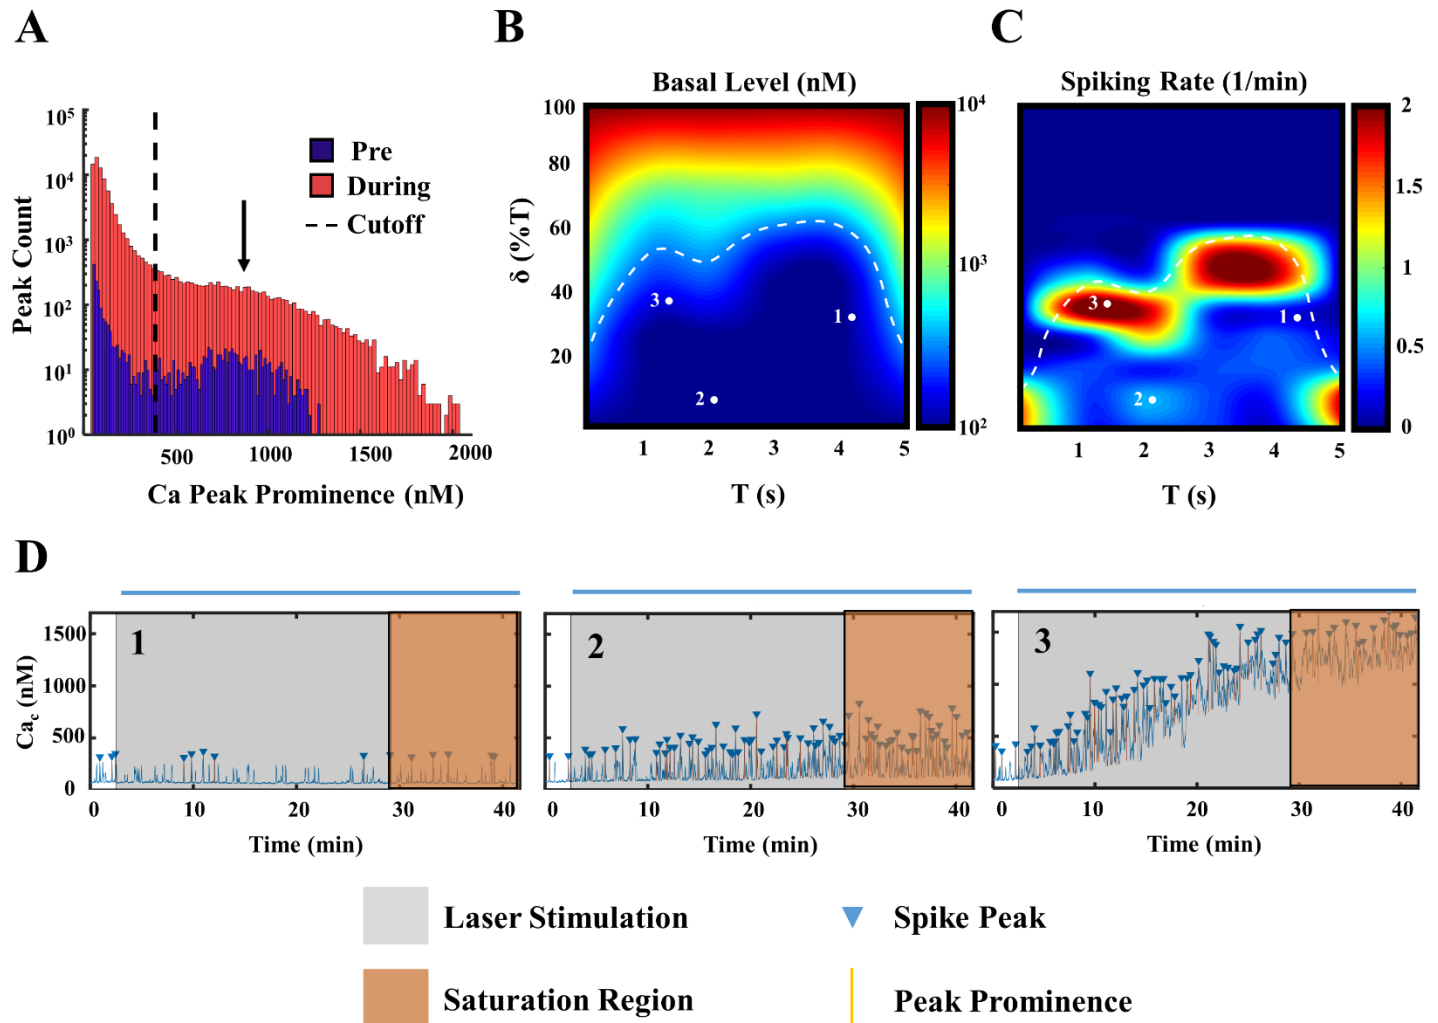

420 **Figure 3. Response of a ChETA - expressing astrocyte to various light stimulation paradigms. A.** Histogram  
 421 depicting the peak count in the  $Ca^{2+}$  trace of the astrocyte (log scale) with respect to  $Ca^{2+}$  peak prominence upon  
 422 laser light stimulation. Light stimulation parameters – T was varied between 1-5 s;  $\delta$  between 0-100% of T; unit  
 423 pulse amplitude. The histogram was generated for the pre-stimulus phase (blue) and during stimulus phase (red).  
 424 The cutoff prominence was set to 350 nM, in accordance with the observed bimodal distribution of  $Ca^{2+}$  spikes  
 425 (dashed line), and to assure that 1/f noise related  $Ca^{2+}$  spikes are not included in the analysis. **B.** The T- $\delta$  heat map  
 426 of the  $Ca^{2+}$  basal level for various combinatorial windows of T and  $\delta$ , expressed in the log scale. Specific regions  
 427 in the physiological levels of  $Ca^{2+}$  basal level (indicated by the white dashed trace) are numbered and used for  
 428 further plotting and analysis. **C.** The T- $\delta$  heat map indicating spiking rate in the astrocyte for various combinatorial  
 429 windows of T and  $\delta$ , above the cutoff prominence chosen in (A). White dashed trace delimits the physiological



430 basal levels; as defined in **(B)**. **D**. Representative  $\text{Ca}^{2+}$  signaling traces of points 1, 2 and 3, from **(B)** and **(C)**.  
431 Light stimulation was started at 50 s until the end of the simulation (blue bar). Mean  $\text{Ca}^{2+}$  spiking rate across trials  
432 was calculated once the  $\text{Ca}^{2+}$  signal trace reached a steady profile (in orange).

433

434

435

436

437

438

439

440

441

442

443

444

445

446

447

448

449

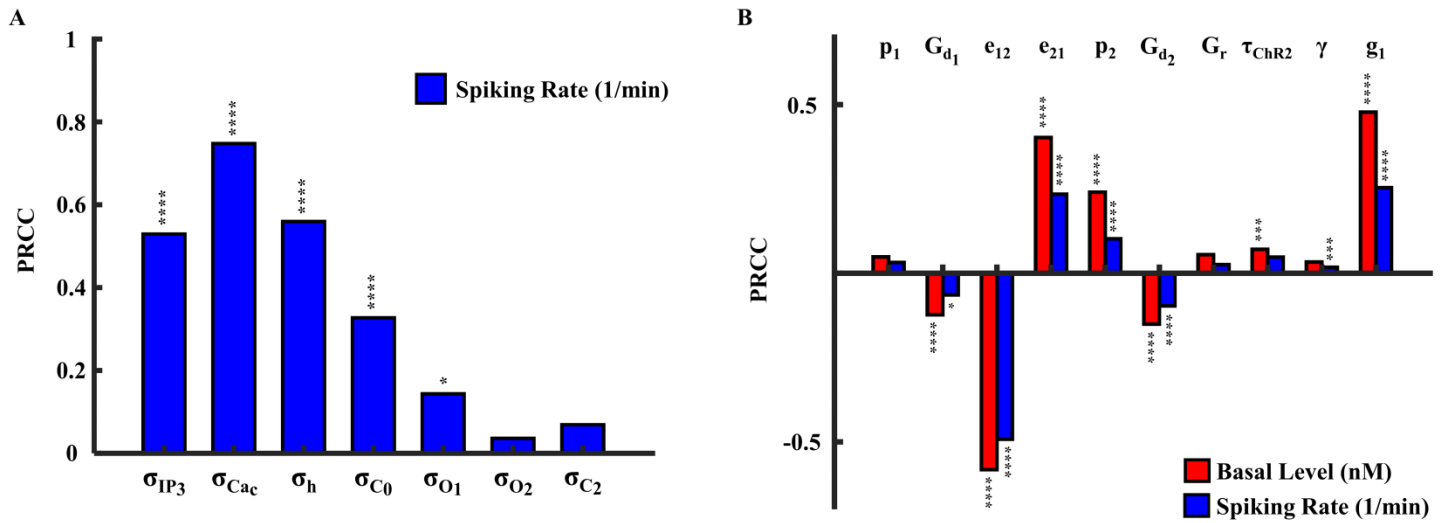

**Figure 4. Sensitivity of the astrocytic  $Ca^{2+}$  response to the state variable variances and ChR2 parameters.**

**A.** Global sensitivity analysis results depicting sensitivity of astrocyte  $Ca^{2+}$  response to stochastic noises, without light stimulation. Partial rank correlation coefficients (PRCCs) with respect to the Wiener processes of the state variables are plotted. 500 parameter sets chosen by the Latin hypercube sampling (LHS) method with uniform distribution. \* depicts significance levels. Spiking rate  $p$ -values:  $\sigma_{IP_3} = 1.3 \times 10^{-22}$ ;  $\sigma_{Ca_c} = 8.9 \times 10^{-54}$ ;  $\sigma_h = 1.4 \times 10^{-25}$ ;  $\sigma_{C_0} = 9.5 \times 10^{-9}$ ;  $\sigma_{O_1} = 0.014$ . **B.** Plot of the PRCCs for each parameter of ChR2 during light stimulation ( $T = 4.5$  s,  $\delta = 1.35$  s (30% of  $T$ ), light stimulation started at 50 s and continued for the duration of the simulation, (total simulation time = 40 min, 10 trials) with respect to the basal level (nM) and spiking rate (1/min); peak prominence = 350 nM. 1000 parameter sets were chosen using the LHS sampling method with uniform distribution. Spiking rate  $p$ -values:  $G_{d_1} = 0.016$ (\*);  $e_{12} \sim 0$ ;  $e_{21} \sim 0$ ;  $p_2 \sim 0$ ;  $G_{d_2} = 5 \times 10^{-7}$ (\*\*\*\*);  $\gamma = 0.004$ (\*\*\*);  $g_1 \sim 0$ (\*\*\*\*). Basal level  $p$ -values:  $G_{d_1} = 0.001$ (\*\*\*);  $e_{12} \sim 0$ ;  $e_{21} \sim 0$ ;  $p_2 = 3.1 \times 10^{-14}$ (\*\*\*\*);  $G_{d_2} = 2.3 \times 10^{-6}$ (\*\*\*\*);  $\tau_{ChR2} = 0.027$ (\*\*\*);  $g_1 \sim 0$ (\*\*\*\*).

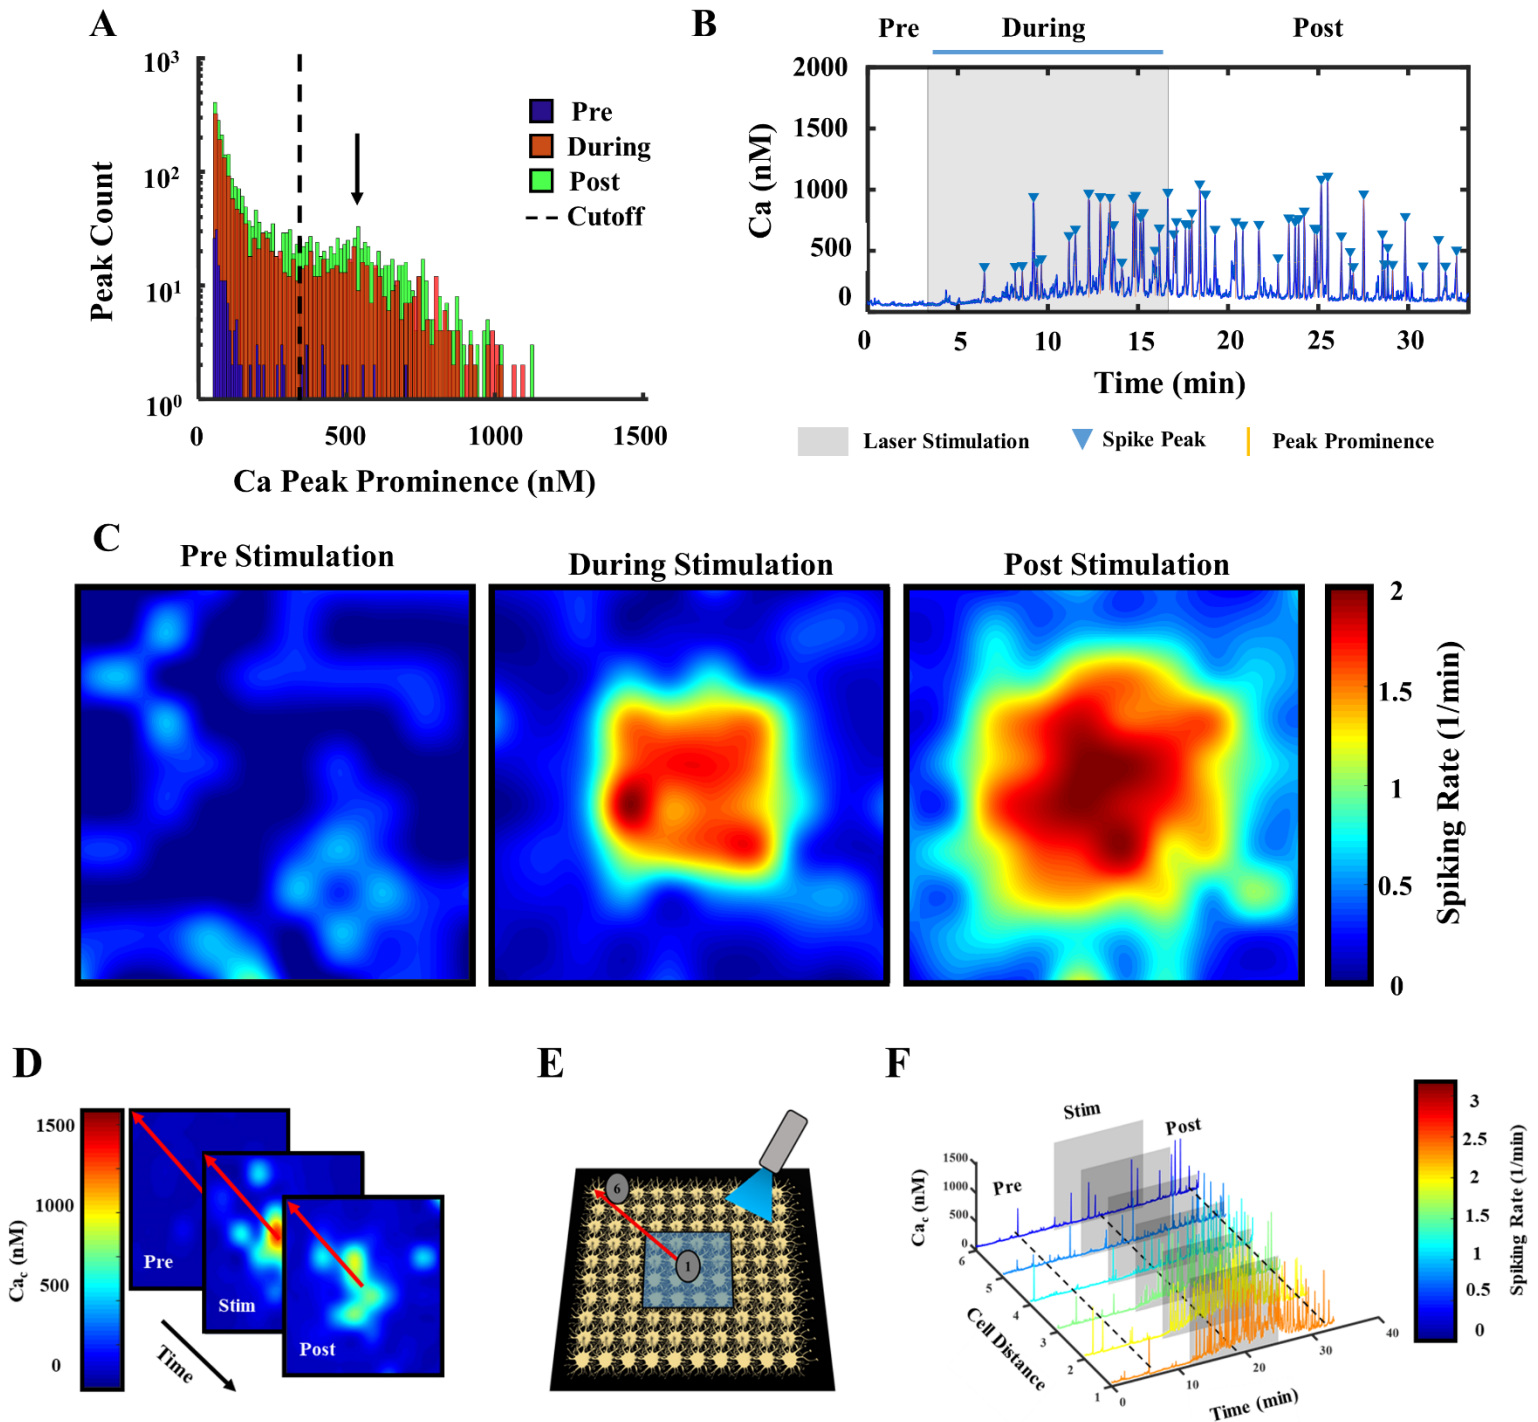

466 **Figure 5. Network-wide behavior of astrocytic Ca<sup>2+</sup> responses to light stimulation.** A. Histogram (log scale)  
 467 depicting the peak count in the Ca<sup>2+</sup> traces in a 10 x 10 network (100 astrocytes) homogeneously expressing  
 468 ChETA with respect to the Ca<sup>2+</sup> peak prominence during the pre-stimulus (blue), during stimulus (red) and post  
 469 stimulus (green) phases. Light stimulation parameters – T = 2 s; δ = 15%; unit pulse amplitude. The cutoff peak  
 470 prominence was set to 350 nM (dashed line) due to the bimodal distribution of Ca<sup>2+</sup> spikes and assures that 1/f

471 related irrelevant  $\text{Ca}^{2+}$  spikes are excluded from the analysis. **B.** A representative trace showing the  $\text{Ca}^{2+}$  signaling  
472 profile over time. Light stimulation was performed between 12 – 25 min. (grey shaded region, blue bar). **C.** Heat  
473 map indicating the mean  $\text{Ca}^{2+}$  spiking rate above the cutoff prominence (indicated in **(A)**) in the network - pre,  
474 during and post light stimulation. **D.** Heat map indicating the  $\text{Ca}^{2+}$  basal levels in the network – pre, during and  
475 post light stimulation. Astrocytes oriented across a diagonal (indicated by red line) were used for further  
476 interpretation in **(F)**. **E.** Illustration of 4 x 4 subnetwork of astrocytes focally stimulated by blue laser light  
477 (indicated by the blue shaded region). 6 astrocytes across the diagonal (in the direction of the red arrow), were  
478 used to evaluate the effect of distance from the stimulation on cytosolic  $\text{Ca}^{2+}$  profiles. **F.** Depiction of  $\text{Ca}^{2+}$  signal  
479 profiles of these 6 astrocytes (in **E**), plotted as a function of time; light stimulation window in grey, color bar  
480 represents the mean spiking rate.

481

482

483

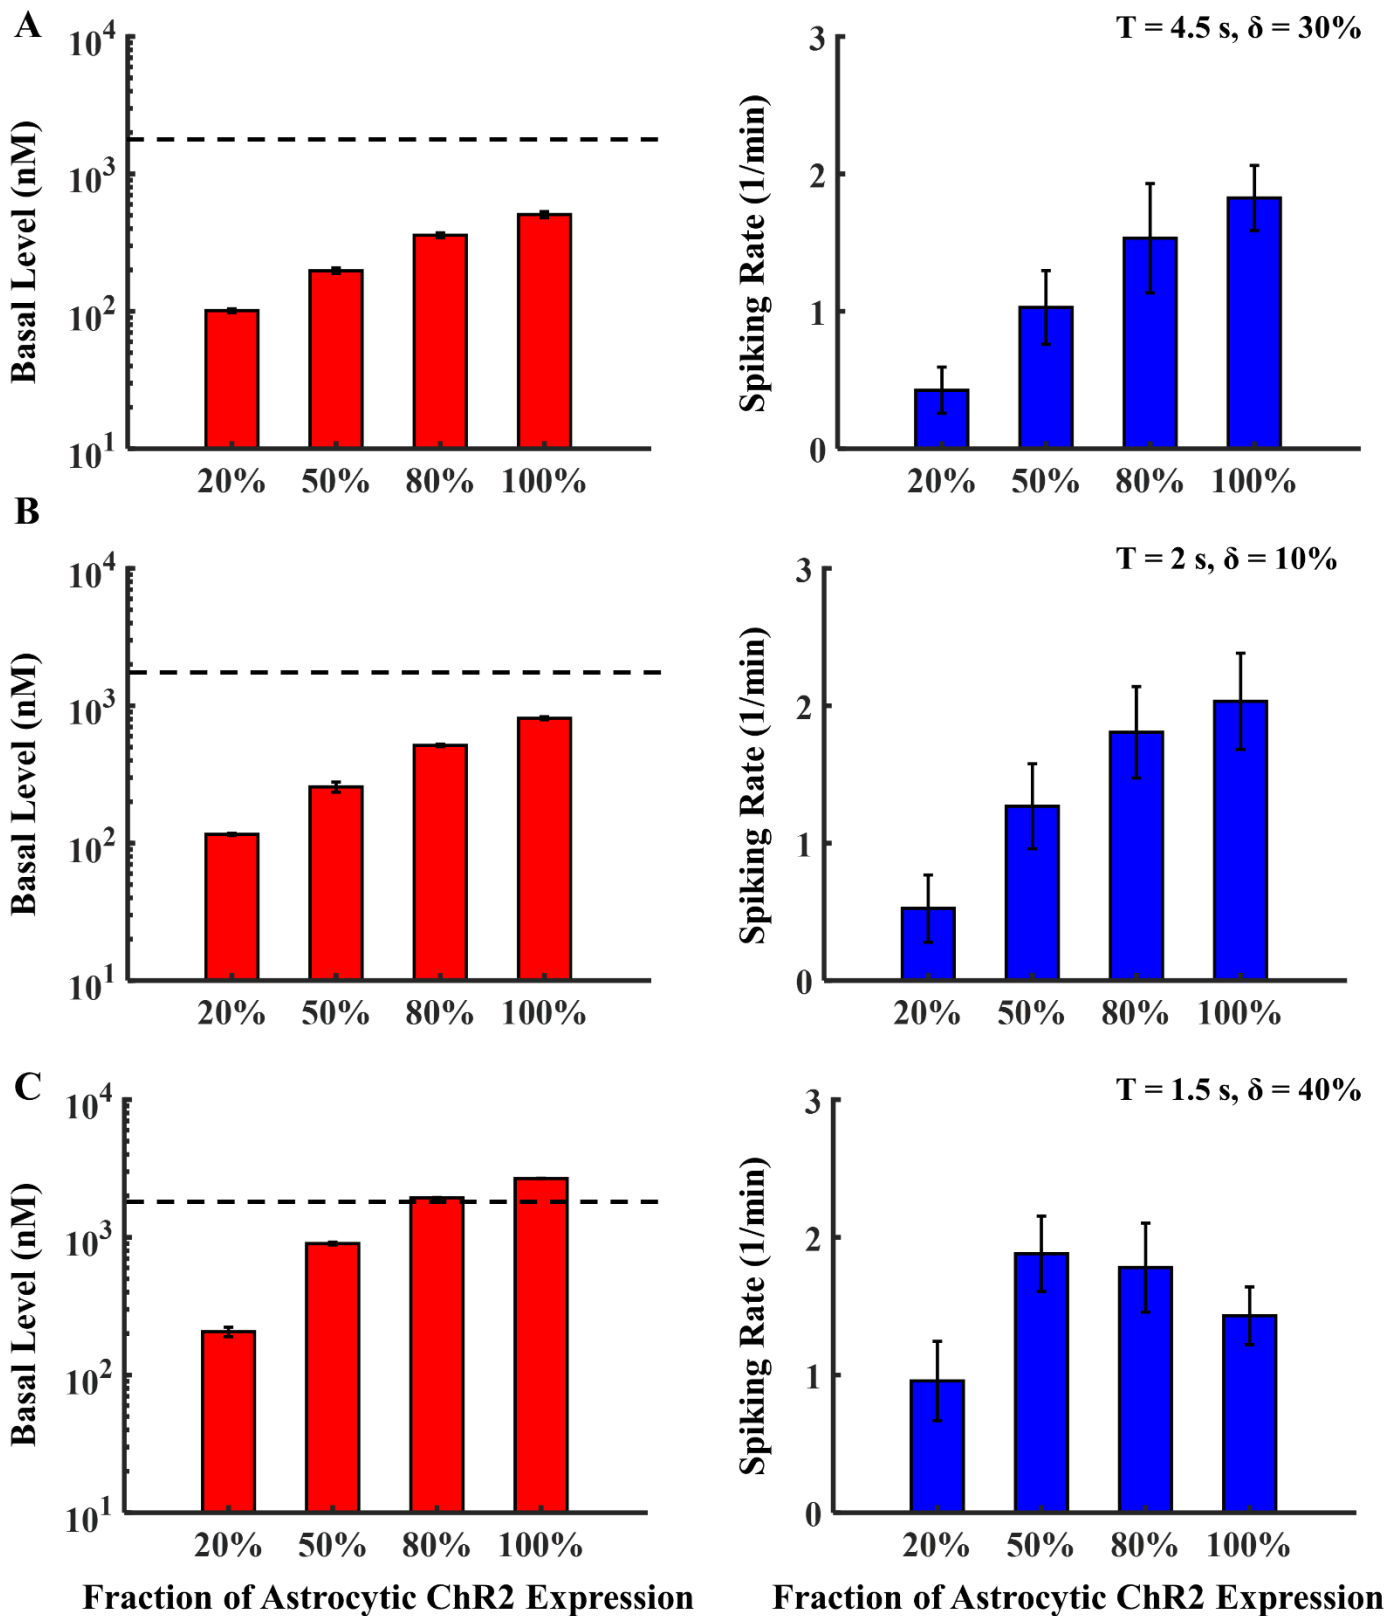

484 **Figure 6. Effect of ChETA expression heterogeneity on network-wide light stimulation.** Each bar chart shows  
485 the mean network basal level (nM) and spiking rate (1/min) as a function of astrocyte ChR2 expression fraction.

486 Each part corresponds to network-wide stimulation with 1 of 3 different paradigms: **A.** point 1 of Figure 3 ( $T =$   
487  $4.5$  s,  $\delta = 1.35$  s (30% of  $T$ ), low  $\text{Ca}^{2+}$  activity), **B.** point 2 of Fig. 3 ( $T = 2$  s,  $\delta = 0.2$  s (10% of  $T$ ), intermediate  
488  $\text{Ca}^{2+}$  activity), and **C.** point 3 of Figure 3 ( $T = 1.5$  s,  $\delta = 0.6$  s (40% of  $T$ ), high  $\text{Ca}^{2+}$  activity). In all 3 cases, the  
489 stimulation was initiated at 50 s and continued for the duration of the simulation, and the black dashed line marks  
490 the maximum physiological basal level of astrocytes.

## Supplementary Figures -Effect of light stimulation on different ChR2 variants

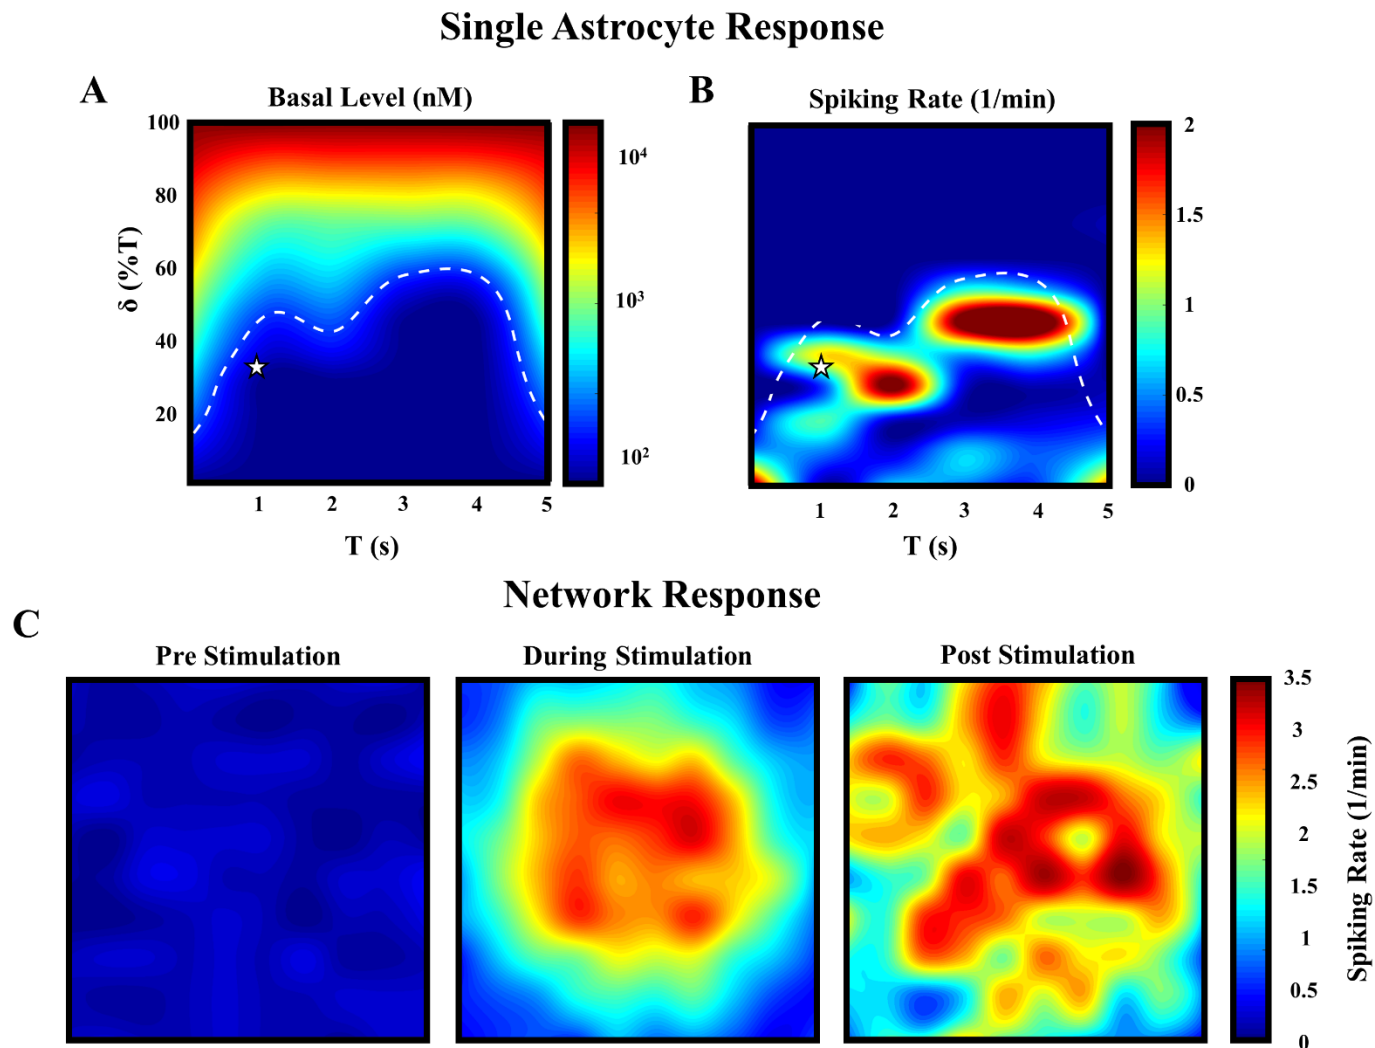

**Figure S1. Response of ChRET/TC - expressing astrocytes to light stimulation** **A.** Heat map of the  $\text{Ca}^{2+}$  steady

state basal level for various combinatorial windows of time duration (T) and pulse widths ( $\delta$ ; expressed as a

percentage of T), expressed in the log scale. The physiological levels of  $\text{Ca}^{2+}$  basal level are indicated by the white

dashed line. **B.** Heat map indicating spiking rate in the astrocyte for various combinatorial windows of T and  $\delta$ ,

above the cutoff prominence chosen in Figure 3A. **C.** Heat maps indicating the mean spiking rate of astrocytes in

the network - pre, during and post light stimulation (T = 1 s,  $\delta = 0.3$  s (30% of T), the point denoted by star in **A**

and **B.**

## Single Astrocyte Response

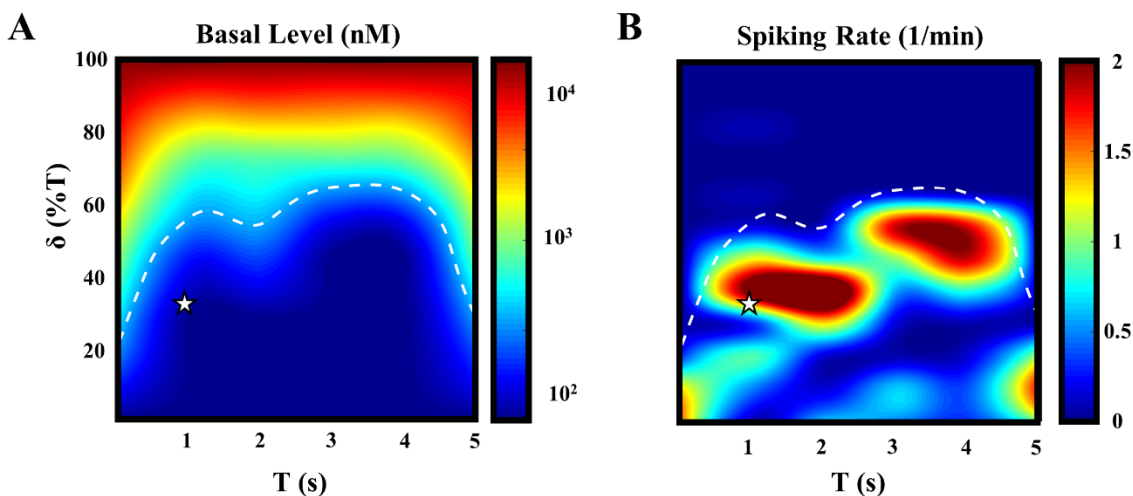

## Network Response

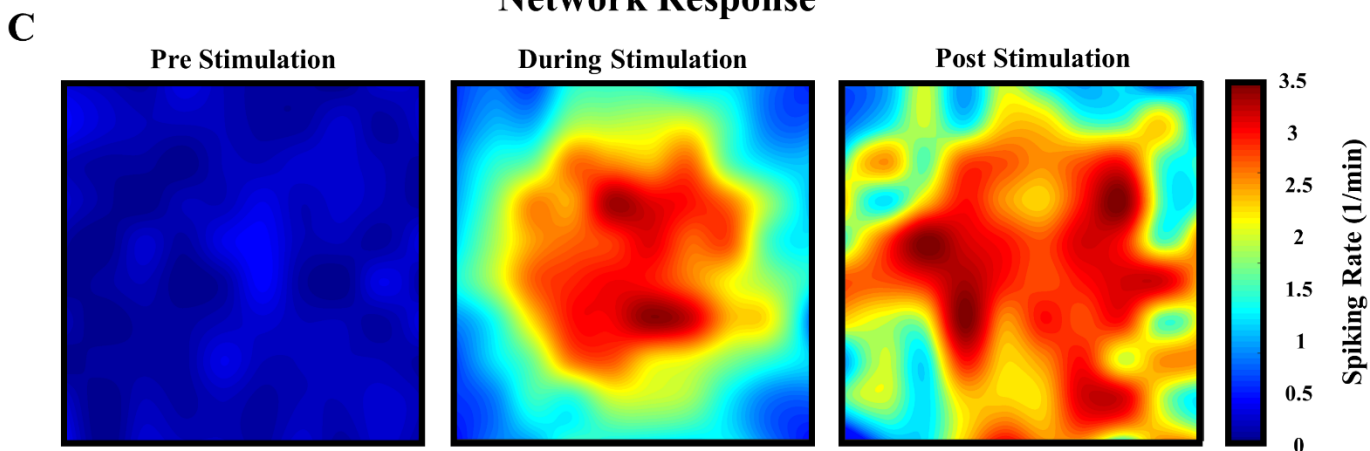

515 **Figure S2. Response of ChRwt1 - expressing astrocytes to light stimulation. A.** Heat map of the  $Ca^{2+}$  steady  
516 state basal level for various combinatorial windows of time duration ( $T$ ) and pulse widths ( $\delta$ ; expressed as a  
517 percentage of  $T$ ), expressed in the log scale. The physiological levels of  $Ca^{2+}$  basal level are indicated by the white  
518 dashed line. **B.** Heat map indicating spiking rate in the astrocyte for various combinatorial windows of  $T$  and  $\delta$ ,  
519 above the cutoff prominence chosen in Figure 3A. **C.** Heat maps indicating the mean spiking rate of astrocytes in  
520 the network - pre, during and post light stimulation ( $T = 1$  s,  $\delta = 0.3$  s (30% of  $T$ ), the point denoted by star in **A**  
521 and **B**.

522

523



## Single Astrocyte Response

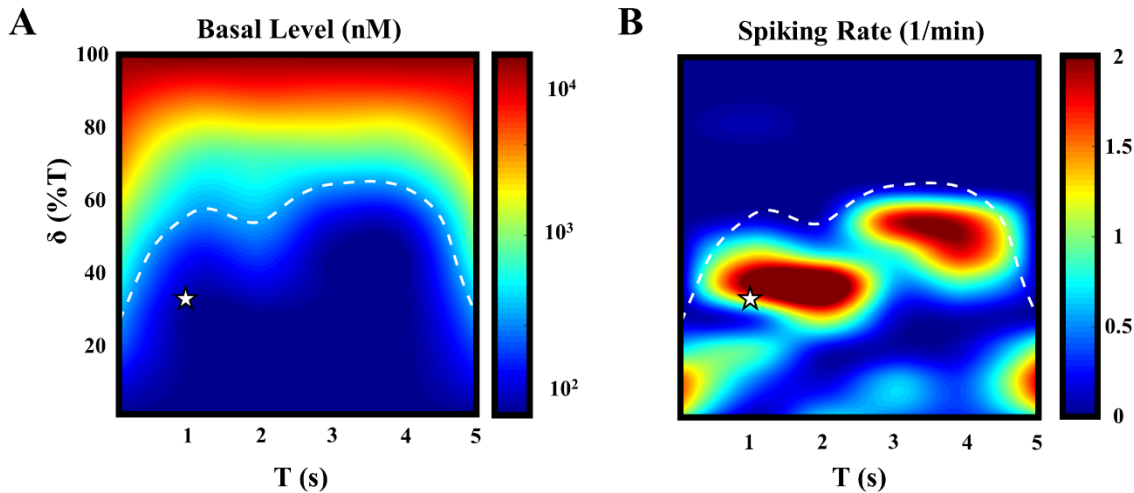

## Network Response

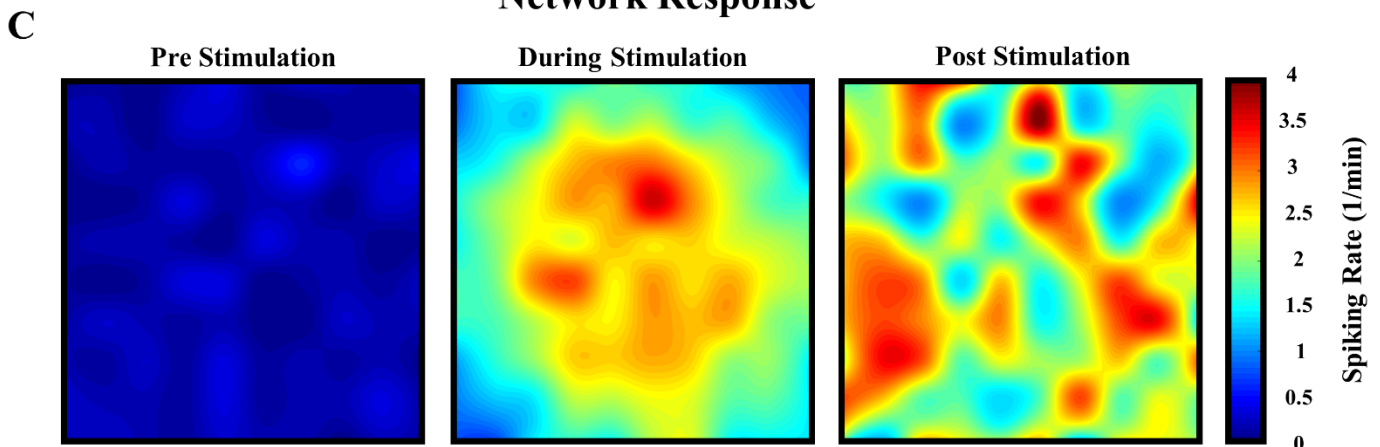

524 **Figure S3. Response of ChRwt2 - expressing astrocytes to light stimulation.** **A.** Heat map of the Ca<sup>2+</sup> final  
525 basal level for various combinatorial windows of time duration (T) and pulse widths ( $\delta$ ; expressed as a percentage  
526 of T), expressed in the log scale. The physiological levels of Ca<sup>2+</sup> basal level are indicated by the white dashed  
527 line. **B.** Heat map indicating spiking rate in the astrocyte for various combinatorial windows of T and  $\delta$ , above  
528 the cutoff prominence chosen in Figure 3A. **C.** Heat maps indicating the mean spiking rate of astrocytes in the  
529 network - pre, during and post light stimulation (T = 1 s,  $\delta$  = 0.3 s (30% of T), point denoted by star in **A** and **B**.

530 **Video S1. Movie of complete network-wide behavior of astrocytes to light stimulation.** In this video the  
531 stimulation window is marked in red. Parameters and stimulation specifics are as in Figure 5.

532

533

## 534 Bibliography

- 535 1. Carmignoto G, Gómez-Gonzalo M. The contribution of astrocyte signalling to neurovascular coupling. *Brain research*  
536 *reviews*. 2010;63(1-2):138-48.
- 537 2. Riera JJ, Sumiyoshi A. Brain oscillations: ideal scenery to understand the neurovascular coupling. *Current opinion in*  
538 *neurology*. 2010;23(4):374-81.
- 539 3. Zonta M, Angulo MC, Gobbo S, Rosengarten B, Hossmann K-A, Pozzan T, et al. Neuron-to-astrocyte signaling is  
540 central to the dynamic control of brain microcirculation. *Nature neuroscience*. 2003;6(1):43.
- 541 4. Araque A, Parpura V, Sanzgiri RP, Haydon PG. Glutamate-dependent astrocyte modulation of synaptic transmission  
542 between cultured hippocampal neurons. *European Journal of Neuroscience*. 1998;10(6):2129-42.
- 543 5. Volterra A, Meldolesi J. Astrocytes, from brain glue to communication elements: the revolution continues. *Nature*  
544 *Reviews Neuroscience*. 2005;6(8):626.
- 545 6. Zorec R, Araque A, Carmignoto G, Haydon PG, Verkhratsky A, Parpura V. Astroglial excitability and  
546 gliotransmission: an appraisal of Ca<sup>2+</sup> as a signalling route. *ASN neuro*. 2012;4(2):AN20110061.
- 547 7. Magistretti PJ. Neuron–glia metabolic coupling and plasticity. *Experimental physiology*. 2011;96(4):407-10.
- 548 8. Smith SJ. Neural signalling: Neuromodulatory astrocytes. *Current Biology*. 1994;4(9):807-10.
- 549 9. Riera JJ, Schousboe A, Waagepetersen HS, Howarth C, Hyder F. The micro-architecture of the cerebral cortex:  
550 functional neuroimaging models and metabolism. *Neuroimage*. 2008;40(4):1436-59.
- 551 10. Devinsky O, Vezzani A, Najjar S, De Lanerolle NC, Rogawski MA. Glia and epilepsy: excitability and inflammation.  
552 *Trends in neurosciences*. 2013;36(3):174-84.
- 553 11. Agulhon C, Sun M-Y, Murphy T, Myers T, Lauderdale K, Fiacco TA. Calcium signaling and gliotransmission in  
554 normal vs. reactive astrocytes. *Frontiers in pharmacology*. 2012;3:139.
- 555 12. Hanisch UK. Microglia as a source and target of cytokines. *Glia*. 2002;40(2):140-55.
- 556 13. Vezzani A, Friedman A, Dingledine RJ. The role of inflammation in epileptogenesis. *Neuropharmacology*.  
557 2013;69:16-24.
- 558 14. Eid T, Tu N, Lee T-SW, Lai JC. Regulation of astrocyte glutamine synthetase in epilepsy. *Neurochemistry*  
559 *international*. 2013;63(7):670-81.

- 560 15. Girouard H, Iadecola C. Neurovascular coupling in the normal brain and in hypertension, stroke, and Alzheimer  
561 disease. *Journal of applied physiology*. 2006;100(1):328-35.
- 562 16. Losi G, Cammarota M, Carmignoto G. The role of astroglia in the epileptic brain. *Frontiers in pharmacology*.  
563 2012;3:132.
- 564 17. Seifert G, Carmignoto G, Steinhäuser C. Astrocyte dysfunction in epilepsy. *Brain research reviews*. 2010;63(1-  
565 2):212-21.
- 566 18. Sidoryk-Wegrzynowicz M, Wegrzynowicz M, Lee E, Bowman AB, Aschner M. Role of astrocytes in brain function  
567 and disease. *Toxicologic pathology*. 2011;39(1):115-23.
- 568 19. Verkhratsky A, Steardo L, Parpura V, Montana V. Translational potential of astrocytes in brain disorders. *Progress in*  
569 *neurobiology*. 2016;144:188-205.
- 570 20. Wetherington J, Serrano G, Dingledine R. Astrocytes in the epileptic brain. *Neuron*. 2008;58(2):168-78.
- 571 21. Berridge MJ. Elementary and global aspects of calcium signalling. *The Journal of physiology*. 1997;499(2):291-306.
- 572 22. Cornell-Bell AH, Finkbeiner SM, Cooper MS, Smith SJ. Glutamate induces calcium waves in cultured astrocytes:  
573 long-range glial signaling. *Science*. 1990;247(4941):470-3.
- 574 23. De Pittà M, Volman V, Berry H, Parpura V, Volterra A, Ben-Jacob E. Computational quest for understanding the role  
575 of astrocyte signaling in synaptic transmission and plasticity. *Frontiers in computational neuroscience*. 2012;6:98.
- 576 24. Fujii Y, Maekawa S, Morita M. Astrocyte calcium waves propagate proximally by gap junction and distally by  
577 extracellular diffusion of ATP released from volume-regulated anion channels. *Scientific reports*. 2017;7(1):13115.
- 578 25. Laskey AD, Roth BJ, Simpson PB, Russell JT. Images of Ca<sup>2+</sup> flux in astrocytes: evidence for spatially distinct sites  
579 of Ca<sup>2+</sup> release and uptake. *Cell Calcium*. 1998;23(6):423-32.
- 580 26. Araque A, Parpura V, Sanzgiri RP, Haydon PG. Tripartite synapses: glia, the unacknowledged partner. *Trends in*  
581 *neurosciences*. 1999;22(5):208-15.
- 582 27. Fleischer W, Theiss S, Slotta J, Holland C, Schnitzler A. High-frequency voltage oscillations in cultured astrocytes.  
583 *Physiological reports*. 2015;3(5).
- 584 28. Hassinger T, Guthrie P, Atkinson P, Bennett M, Kater S. An extracellular signaling component in propagation of  
585 astrocytic calcium waves. *Proceedings of the National Academy of Sciences*. 1996;93(23):13268-73.

- 586 29. Nedergaard M, Cooper AJ, Goldman SA. Gap junctions are required for the propagation of spreading depression.  
587 *Journal of neurobiology*. 1995;28(4):433-44.
- 588 30. Charles AC, Merrill JE, Dirksen ER, Sandersont MJ. Intercellular signaling in glial cells: calcium waves and  
589 oscillations in response to mechanical stimulation and glutamate. *Neuron*. 1991;6(6):983-92.
- 590 31. Guthrie PB, Knappenberger J, Segal M, Bennett MV, Charles AC, Kater SB. ATP released from astrocytes mediates  
591 glial calcium waves. *Journal of Neuroscience*. 1999;19(2):520-8.
- 592 32. Stout CE, Costantin JL, Naus CC, Charles AC. Intercellular calcium signaling in astrocytes via ATP release through  
593 connexin hemichannels. *Journal of Biological Chemistry*. 2002;277(12):10482-8.
- 594 33. Parpura V, Basarsky TA, Liu F, Jeftinija K, Jeftinija S, Haydon PG. Glutamate-mediated astrocyte–neuron signalling.  
595 *Nature*. 1994;369(6483):744.
- 596 34. Jeremic A, Jeftinija K, Stevanovic J, Glavaski A, Jeftinija S. ATP stimulates calcium-dependent glutamate release  
597 from cultured astrocytes. *Journal of neurochemistry*. 2001;77(2):664-75.
- 598 35. Ellis E, McKinney J, Willoughby K, Liang S, Povlishock J. A new model for rapid stretch-induced injury of cells in  
599 culture: characterization of the model using astrocytes. *Journal of neurotrauma*. 1995;12(3):325-39.
- 600 36. Choi JW, Gardell SE, Herr DR, Rivera R, Lee C-W, Noguchi K, et al. FTY720 (fingolimod) efficacy in an animal  
601 model of multiple sclerosis requires astrocyte sphingosine 1-phosphate receptor 1 (S1P1) modulation. *Proceedings of*  
602 *the National Academy of Sciences*. 2011;108(2):751-6.
- 603 37. Fenno L, Yizhar O, Deisseroth K. The development and application of optogenetics. *Annual review of neuroscience*.  
604 2011;34.
- 605 38. Mascaro ALA, Silvestri L, Sacconi L, Pavone FS. Breakthroughs in Photonics 2012: Nonlinear Laser Imaging for  
606 Neuroscience. *IEEE Photonics Journal*. 2013;5(2):0701006-.
- 607 39. Mohanty SK, Lakshminarayanan V. Optical techniques in optogenetics. *Journal of modern optics*.  
608 2015;62(12):949-70.
- 609 40. Vaziri A, Emiliani V. Reshaping the optical dimension in optogenetics. *Current opinion in neurobiology*.  
610 2012;22(1):128-37.
- 611 41. Adamantidis AR, Zhang F, de Lecea L, Deisseroth K. Optogenetics: opsins and optical interfaces in neuroscience.  
612 *Cold Spring Harbor Protocols*. 2014;2014(8):pdb. top083329.

- 613 42. Deisseroth K. Optogenetics: 10 years of microbial opsins in neuroscience. *Nature neuroscience*. 2015;18(9):1213.
- 614 43. Krook-Magnuson E, Ledri M, Soltesz I, Kokaia M. How might novel technologies such as optogenetics lead to better  
615 treatments in epilepsy? *Issues in Clinical Epileptology: A View from the Bench*: Springer; 2014. p. 319-36.
- 616 44. Berndt A, Schoenenberger P, Mattis J, Tye KM, Deisseroth K, Hegemann P, et al. High-efficiency channelrhodopsins  
617 for fast neuronal stimulation at low light levels. *Proceedings of the National Academy of Sciences*.  
618 2011;108(18):7595-600.
- 619 45. Lin JY. A user's guide to channelrhodopsin variants: features, limitations and future developments. *Experimental*  
620 *physiology*. 2011;96(1):19-25.
- 621 46. Lin JY. Optogenetic excitation of neurons with channelrhodopsins: light instrumentation, expression systems, and  
622 channelrhodopsin variants. *Progress in brain research*. 196: Elsevier; 2012. p. 29-47.
- 623 47. Lin JY, Lin MZ, Steinbach P, Tsien RY. Characterization of engineered channelrhodopsin variants with improved  
624 properties and kinetics. *Biophysical journal*. 2009;96(5):1803-14.
- 625 48. Gunaydin LA, Yizhar O, Berndt A, Sohal VS, Deisseroth K, Hegemann P. Ultrafast optogenetic control. *Nature*  
626 *neuroscience*. 2010;13(3):387.
- 627 49. Prigge M, Schneider F, Tsunoda SP, Shilyansky C, Wietek J, Deisseroth K, et al. Color-tuned channelrhodopsins for  
628 multiwavelength optogenetics. *Journal of Biological Chemistry*. 2012;jbc. M112. 391185.
- 629 50. Figueiredo á, Lane S, Tang F, Liu B, Hewinson J, Marina N, et al. Optogenetic experimentation on astrocytes.  
630 *Experimental physiology*. 2011;96(1):40-50.
- 631 51. Figueiredo M, Lane S, Stout Jr RF, Liu B, Parpura V, Teschemacher AG, et al. Comparative analysis of optogenetic  
632 actuators in cultured astrocytes. *Cell Calcium*. 2014;56(3):208-14.
- 633 52. Gradinaru V, Mogri M, Thompson KR, Henderson JM, Deisseroth K. Optical deconstruction of parkinsonian neural  
634 circuitry. *science*. 2009;324(5925):354-9.
- 635 53. Masamoto K, Unekawa M, Watanabe T, Toriumi H, Takuwa H, Kawaguchi H, et al. Unveiling astrocytic control of  
636 cerebral blood flow with optogenetics. *Scientific reports*. 2015;5:11455.
- 637 54. Takata N, Sugiura Y, Yoshida K, Koizumi M, Hiroshi N, Honda K, et al. Optogenetic astrocyte activation evokes  
638 BOLD fMRI response with oxygen consumption without neuronal activity modulation. *Glia*. 2018.

- 639 55. Adamsky A, Kol A, Kreisel T, Doron A, Ozeri-Engelhard N, Melcer T, et al. Astrocytic Activation Generates De  
640 Novo Neuronal Potentiation and Memory Enhancement. *Cell*. 2018.
- 641 56. Poskanzer KE, Yuste R. Astrocytes regulate cortical state switching in vivo. *Proceedings of the National Academy of*  
642 *Sciences*. 2016;113(19):E2675-E84.
- 643 57. Ding X, Zhang X, Ji L. Contribution of calcium fluxes to astrocyte spontaneous calcium oscillations in deterministic  
644 and stochastic models. *Applied Mathematical Modelling*. 2018;55:371-82.
- 645 58. Riera J, Hatanaka R, Uchida T, Ozaki T, Kawashima R. Quantifying the uncertainty of spontaneous Ca<sup>2+</sup> oscillations  
646 in astrocytes: particulars of Alzheimer's disease. *Biophysical journal*. 2011;101(3):554-64.
- 647 59. Riera J, Hatanaka R, Ozaki T, Kawashima R. Modeling the spontaneous Ca<sup>2+</sup> oscillations in astrocytes:  
648 inconsistencies and usefulness. *Journal of integrative neuroscience*. 2011;10(04):439-73.
- 649 60. Stefanescu RA, Shivakeshavan R, Khargonekar PP, Talathi SS. Computational modeling of channelrhodopsin-2  
650 photocurrent characteristics in relation to neural signaling. *Bulletin of mathematical biology*. 2013;75(11):2208-40.
- 651 61. Williams JC, Xu J, Lu Z, Klimas A, Chen X, Ambrosi CM, et al. Computational optogenetics: empirically-derived  
652 voltage-and light-sensitive channelrhodopsin-2 model. *PLoS computational biology*. 2013;9(9):e1003220.
- 653 62. De Young GW, Keizer J. A single-pool inositol 1, 4, 5-trisphosphate-receptor-based model for agonist-stimulated  
654 oscillations in Ca<sup>2+</sup> concentration. *Proceedings of the National Academy of Sciences*. 1992;89(20):9895-9.
- 655 63. Li Y-X, Rinzel J. Equations for InsP<sub>3</sub> receptor-mediated [Ca<sup>2+</sup>] oscillations derived from a detailed kinetic model: a  
656 Hodgkin-Huxley like formalism. *Journal of theoretical Biology*. 1994;166(4):461-73.
- 657 64. Shuai J-W, Jung P. Stochastic properties of Ca<sup>2+</sup> release of inositol 1, 4, 5-trisphosphate receptor clusters.  
658 *Biophysical journal*. 2002;83(1):87-97.
- 659 65. Ozaki T. A local linearization approach to nonlinear filtering. *International Journal of Control*. 1993;57(1):75-96.
- 660 66. Marino S, Hogue IB, Ray CJ, Kirschner DE. A methodology for performing global uncertainty and sensitivity  
661 analysis in systems biology. *Journal of theoretical biology*. 2008;254(1):178-96.
- 662 67. McKay MD, Beckman RJ, Conover WJ. Comparison of three methods for selecting values of input variables in the  
663 analysis of output from a computer code. *Technometrics*. 1979;21(2):239-45.

- 664 68. Hermonat PL, Muzyczka N. Use of adeno-associated virus as a mammalian DNA cloning vector: transduction of  
665 neomycin resistance into mammalian tissue culture cells. *Proceedings of the National Academy of Sciences*.  
666 1984;81(20):6466-70.
- 667 69. McCown TJ, Xiao X, Li J, Breese GR, Samulski RJ. Differential and persistent expression patterns of CNS gene  
668 transfer by an adeno-associated virus (AAV) vector. *Brain research*. 1996;713(1-2):99-107.
- 669 70. Savtchenko LP, Bard L, Jensen TP, Reynolds JP, Kraev I, Medvedev N, et al. Disentangling astroglial physiology  
670 with a realistic cell model in silico. *Nature communications*. 2018;9(1):3554.
- 671 71. Lallouette J, De Pittà M, Berry H. Astrocyte networks and intercellular calcium propagation. *Computational*  
672 *Glioscience*: Springer; 2019. p. 177-210.
- 673 72. Fink CC, Slepchenko B, Loew LM. Determination of time-dependent inositol-1, 4, 5-trisphosphate concentrations  
674 during calcium release in a smooth muscle cell. *Biophysical journal*. 1999;77(1):617-28.
- 675 73. Di Garbo A, Barbi M, Chillemi S, Alloisio S, Nobile M. Calcium signalling in astrocytes and modulation of neural  
676 activity. *Biosystems*. 2007;89(1-3):74-83.
- 677 74. Stamatakis M, Mantzaris NV. Modeling of ATP-mediated signal transduction and wave propagation in astrocytic  
678 cellular networks. *Journal of theoretical biology*. 2006;241(3):649-68.
- 679 75. Lavrentovich M, Hemkin S. A mathematical model of spontaneous calcium (II) oscillations in astrocytes. *Journal of*  
680 *Theoretical Biology*. 2008;251(4):553-60.
- 681 76. Zeng S, Li B, Zeng S, Chen S. Simulation of spontaneous Ca<sup>2+</sup> oscillations in astrocytes mediated by voltage-gated  
682 calcium channels. *Biophysical journal*. 2009;97(9):2429-37.
- 683 77. Ullah G, Jung P, Cornell-Bell AH. Anti-phase calcium oscillations in astrocytes via inositol (1, 4, 5)-trisphosphate  
684 regeneration. *Cell calcium*. 2006;39(3):197-208.
- 685 78. Williams V, Grossman R, Edmunds SM. Volume and surface area estimates of astrocytes in the sensorimotor cortex  
686 of the cat. *Neuroscience*. 1980;5(7):1151-9.
- 687
